1 **Deficiency of nucleotide excision repair explains mutational signature observed in**  
2 **cancer**

3

4 Myrthe Jager<sup>1,4</sup>

5 Francis Blokzijl<sup>1,4</sup>

6 Ewart Kuijk<sup>1</sup>

7 Johanna Berti<sup>2</sup>

8 Maria Vougioukalaki<sup>3</sup>

9 Roel Janssen<sup>1</sup>

10 Nicolle Besselink<sup>1</sup>

11 Sander Boymans<sup>1</sup>

12 Joep de Ligt<sup>1</sup>

13 Jakob Skou Pedersen<sup>2</sup>

14 Jan Hoeijmakers<sup>3</sup>

15 Joris Pothof<sup>3</sup>

16 Ruben van Boxtel<sup>1,†,\*</sup>

17 Edwin Cuppen<sup>1,\*</sup>

18 <sup>1</sup>Center for Molecular Medicine and Onco Institute, University Medical Center Utrecht, Utrecht

19 University, Universiteitsweg 100, 3584, CG, Utrecht, The Netherlands

20 <sup>2</sup>Department of Molecular Medicine, Aarhus University, Palle Juul-Jensens Boulevard 99, 8200

21 Aarhus N, Denmark

22 <sup>3</sup>Erasmus Medical Center, Wytemaweg 80, 3015 CN Rotterdam, The Netherlands

23 <sup>4</sup>These authors contributed equally to this work.

24 <sup>†</sup>Present address: Princess Máxima Center for Pediatric Oncology, 3584 CT Utrecht, The Netherlands

25 <sup>\*</sup>Corresponding authors: [R.vanBoxtel@prinsesmaximacentrum.nl](mailto:R.vanBoxtel@prinsesmaximacentrum.nl), [ecuppen@umcutrecht.nl](mailto:ecuppen@umcutrecht.nl)

26

27 Running title: NER-deficiency explains mutational signature

28

29 Keywords: ERCC1, XPC, nucleotide excision repair, NER, adult stem cell, liver, small  
30 intestine, organoids, mutational signatures, Signature 8, cancer, progeria, CRISPR-Cas

31

## 32 **ABSTRACT**

33 Nucleotide excision repair (NER) is one of the main DNA repair pathways that protect cells  
34 against genomic damage. Disruption of this pathway can contribute to the development of  
35 cancer and accelerate aging. Tumors deficient in NER are more sensitive to cisplatin  
36 treatment. Characterization of the mutational consequences of NER-deficiency may  
37 therefore provide important diagnostic opportunities. Here, we analyzed the somatic  
38 mutational profiles of adult stem cells (ASCs) from NER-deficient *Ercc1*<sup>-Δ</sup> mice, using whole-  
39 genome sequencing analysis of clonally derived organoid cultures. Our results indicate that  
40 NER-deficiency increases the base substitution load in liver, but not in small intestinal ASCs,  
41 which coincides with a tissue-specific aging-pathology observed in these mice. The  
42 mutational landscape changes as a result of NER-deficiency in ASCs of both tissues and  
43 shows an increased contribution of Signature 8 mutations, which is a pattern with unknown  
44 etiology that is recurrently observed in various cancer types. The scattered genomic  
45 distribution of the acquired base substitutions indicates that deficiency of global-genome  
46 NER (GG-NER) is responsible for the altered mutational landscape. In line with this, we  
47 observed increased Signature 8 mutations in a GG-NER-deficient human organoid culture in  
48 which *XPC* was deleted using CRISPR-Cas9 gene-editing. Furthermore, genomes of NER-  
49 deficient breast tumors show an increased contribution of Signature 8 mutations compared  
50 with NER-proficient tumors. Elevated levels of Signature 8 mutations may therefore serve as  
51 a biomarker for NER-deficiency and could improve personalized cancer treatment strategies.

52

## 53 **INTRODUCTION**

54 The genome is continuously exposed to mutagenic processes, which can damage the DNA  
55 and can ultimately result in the accumulation of mutations. To counteract these processes,  
56 cells exploit multiple DNA repair pathways that each repair specific lesions. Deficiency of

57 these pathways can contribute to cancer initiation and progression. To increase insight into  
58 the cellular processes that underlie mutation accumulation, such as deficiency of specific  
59 DNA repair pathways, genome-wide mutational patterns of tumors can be characterized  
60 (Alexandrov et al. 2013; Nik-Zainal et al. 2016). To date, systematic analyses of tumor  
61 genomes have revealed 30 signatures of base substitutions and 6 rearrangement signatures  
62 of mutational processes in cancer genomes (Alexandrov et al. 2013; Nik-Zainal et al. 2016).  
63 These mutational signatures may have important diagnostic value. For example, several  
64 signatures are associated with BRCA1/2 inactivity and can consequently be predictive for a  
65 response to PARP inhibition or cisplatin treatment (Waddell et al. 2015; Davies et al. 2017).

66 Although for some signatures the underlying molecular process (Kim et al. 2016;  
67 Alexandrov et al. 2013, 2016) or involved DNA repair pathway (Kim et al. 2016; Davies et al.  
68 2017; Alexandrov et al. 2013) is known, in-depth mechanistic insight is still lacking for the  
69 majority of the mutational signatures (Petljak and Alexandrov 2016). Efforts to link mutational  
70 processes to specific signatures have mainly focused on associating mutation data from  
71 tumors to mutagen exposure and DNA repair-deficiency. Yet, tumors are genomically highly  
72 unstable and typically multiple processes have contributed to mutation accumulation  
73 (Alexandrov et al. 2013; Nik-Zainal et al. 2016), which hampers the identification of the  
74 processes that cause specific mutational signatures. We recently developed an approach for  
75 measuring mutations in non-cancerous adult stem cells (ASCs), by combining organoid  
76 culturing technology with whole-genome sequencing (WGS) (Jager et al. 2018; Drost et al.  
77 2017). This method can be used to determine the mutations that have accumulated during  
78 life and during culturing. Tissue-specific ASCs maintain a highly stable genome both *in vivo*  
79 and *in vitro*, and therefore provide a stable system to study mutational processes in detail  
80 (Blokzijl et al. 2016; Huch et al. 2015). Furthermore, ASCs constitute a relevant cell source  
81 to study mutational patterns, as these cells are believed to be the cell-of-origin for specific  
82 types of cancer (Barker et al. 2009; Zhu et al. 2016; Adams et al. 2015).

83 Using this technique, we set out to determine the mutational consequences of  
84 deficiency of nucleotide excision repair (NER). NER is one of the main cellular DNA repair

85 pathways (Iyama and Wilson 2013), and consists of two subpathways: global-genome NER  
86 (GG-NER), which repairs bulky helix-distorting lesions throughout the genome, and  
87 transcription-coupled NER (TC-NER), which resolves RNA polymerase blocking lesions  
88 during transcription (Iyama and Wilson 2013; Marteijn et al. 2014; Hoeijmakers 2009).  
89 Somatic mutations in *ERCC2*, a key factor of NER, were previously associated with  
90 Signature 5 in urothelial tumors (Kim et al. 2016). However, NER has been suggested to  
91 underlie multiple mutational signatures, based on large-scale tumor mutation analyses  
92 (Alexandrov et al. 2013), and not all NER-deficient tumors are characterized by a high  
93 Signature 5 contribution (Kim et al. 2016). This observation suggests that NER-deficiency  
94 might be associated with other mutational signatures as well.

95 To characterize the mutational consequences of NER-deficiency, we studied  
96 mutagenesis in *Ercc1*<sup>-Δ</sup> mice and XPC-knockout (*XPC*<sup>KO</sup>) organoids. ERCC1 plays a crucial  
97 role in the core NER pathway involving both GG-NER and TC-NER (Kirschner and Melton  
98 2010; Iyama and Wilson 2013; Sijbers et al. 1996a; Aboussekhra et al. 1995), in crosslink  
99 repair (Rahn et al. 2010), and in single strand annealing (SSA) of double strand breaks (Al-  
100 Minawi et al. 2008). *ERCC1* is mutated in ~4.5% of all human tumors, especially skin and  
101 liver cancer (<http://dcc.icgc.org>), and single nucleotide polymorphisms in *ERCC1* have been  
102 linked to an increased risk of developing colorectal cancer (Ni et al. 2014). *Ercc1*<sup>-Δ</sup> mice are  
103 hemizygous for a single truncated *Ercc1* allele, which largely corrupts protein function (Dollé  
104 et al. 2011; Weeda et al. 1997) and results in decreased NER-activity (Su et al. 2012).  
105 *Ercc1*<sup>-Δ</sup> mice have a reduced lifespan as a result of progeroid-like symptoms and live five  
106 times shorter than wild-type (WT) littermates (Dollé et al. 2011; Vermeij et al. 2016). The  
107 livers of *Ercc1*<sup>-Δ</sup> mice display various aging-like characteristics and pathology (Dollé et al.  
108 2011; Gregg et al. 2012; Niedernhofer et al. 2006; Weeda et al. 1997), whereas, other  
109 organs, such as the small intestine, do not show an obvious pathological phenotype. Thus  
110 the consequences of loss of ERCC1 differ considerably between tissues, although the  
111 reason for this remains unclear. XPC is involved in the recognition of bulky DNA adducts in  
112 the GG-NER pathway specifically (Puumalainen et al. 2015; Iyama and Wilson 2013).

113 Germline mutations in this gene cause Xeroderma Pigmentosum, a disorder characterized  
114 by enhanced sensitivity to UV-light and development of various cancer types at an early age  
115 (Sands et al. 1995; Melis et al. 2008; Dupuy and Sarasin 2015).

116 Here, we combined the organoid culture system with *in vivo* and *in vitro* knockout  
117 models, providing the unique opportunity to characterize the genome-wide mutational  
118 consequences of NER-deficiency in a stable genetic background. Furthermore, we  
119 compared the genome-wide mutational patterns of NER-deficient and NER-proficient tumors  
120 from a breast cancer cohort (Nik-Zainal et al. 2016). Both quantitative and qualitative  
121 mutational differences that are associated with NER status were identified, creating novel  
122 insight into the molecular processes underlying mutation accumulation, cancer, and aging.

123

## 124 **RESULTS**

### 125 **Loss of NER protein ERCC1 increases the number of base substitutions in liver, but** 126 **not in small intestinal mouse ASCs**

127 To characterize the mutational consequences of NER-deficiency, we generated clonal  
128 organoid cultures from single liver and small intestinal ASCs of three female *Ercc1*<sup>-Δ</sup> mice  
129 and three female WT littermates (Fig. 1A). The tissues were harvested at the age of 15  
130 weeks, which is the time point at which *Ercc1*<sup>-Δ</sup> mice generally start to die as a consequence  
131 of early aging pathologies (Vermeij et al. 2016). WGS analysis of DNA isolated from the  
132 clonal organoid cultures allows for reliable determination of the somatic mutations that were  
133 accumulated during life in the original ASCs (Blokzijl et al. 2016; Jager et al. 2018).  
134 Subclonal mutations acquired after the single-cell-step will only be present in a  
135 subpopulation of the cells and are filtered out based on a low allele frequency (Jager et al.  
136 2018). We also sequenced the genomes of polyclonal control biopsies from the tail of each  
137 mouse, which served as control samples to exclude germline variants.

138

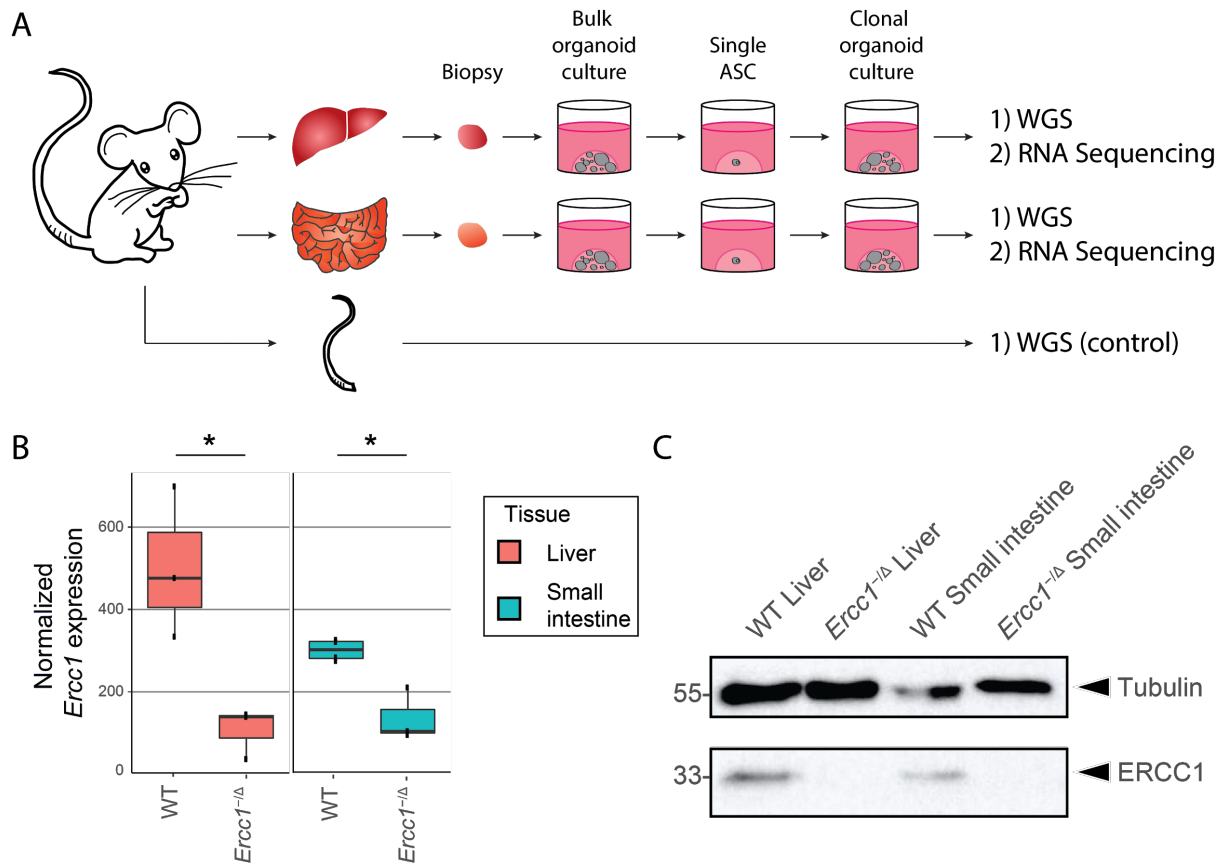

139

140 **Figure 1.** Experimental setup and tissue-specific expression of *Ercc1* in mouse ASCs. (A)

141 Schematic overview of the experimental setup used to determine the mutational patterns in

142 single ASCs from the liver and small intestine of mice. Biopsies from the liver and small

143 intestine of six 15-week-old female mice (three *Ercc1*<sup>-Δ</sup> mice and three WT littermates) were

144 cultured in bulk for ~1.5 week to enrich for ASCs. Subsequently, clonal organoids were

145 derived from these bulk organoid cultures and expanded for approximately 1 month, until

146 there were enough cells to perform both WGS and RNA sequencing. As a control sample for

147 filtering germline variants, a biopsy of the tail of each mouse was also subjected to WGS. (B)

148 Boxplots depicting normalized *Ercc1* expression in ASC organoid cultures from liver and

149 small intestine of *Ercc1*<sup>-Δ</sup> mice (n = 3 and n = 3, respectively) and WT littermates (n = 3 and

150 n = 4, respectively). Asterisks represent significant differences ( $P < 0.05$ , negative binomial

151 test). (C) Western blot analysis of ERCC1 in *Ercc1*<sup>-Δ</sup> and WT small intestinal and liver

152 mouse organoids.

153

154 To determine transcriptome profiles, we performed RNA sequencing on one clonal  
155 organoid culture from each tissue of each mouse. *Ercc1* is significantly differentially  
156 expressed ( $P < 0.05$ , negative binomial test) between WT and *Ercc1*<sup>-Δ</sup> in both liver and small  
157 intestinal ASCs (Fig. 1B), confirming the anticipated effects of the *Ercc1* mutations at the  
158 mRNA level. While there is some *Ercc1* expression in *Ercc1*<sup>-Δ</sup> ASCs, the C-terminal domain  
159 of ERCC1 is essential in ERCC1-XPF complex formation and disruption of this interaction  
160 reduces the stability of ERCC1 protein (Tripsianes et al. 2005; de Laat 1998; Sijbers et al.  
161 1996b). Indeed, ERCC1 protein is not detectable by immunoblotting in *Ercc1*<sup>-Δ</sup> organoid  
162 cultures of both tissues (Fig. 1C). No other DNA repair genes were differentially expressed  
163 between WT and *Ercc1*<sup>-Δ</sup> ASCs (Supplemental File S1). Notably, the expression of 8 out of  
164 9 core NER genes, including *Ercc1*, is higher in WT liver ASCs than WT small intestinal  
165 ASCs (Supplemental Fig. S1, Supplemental Table S1).

166 WGS analysis on the clonally-expanded organoid cultures revealed 4,238 somatic  
167 base substitutions in the autosomal genome of 11 clonal ASC samples (Fig. 2A;  
168 Supplemental Table S2). Targeted deep-sequencing validated ~97.5% of these base  
169 substitutions (Supplemental File S2). Liver ASCs of WT mice acquired  $19.5 \pm 4.1$  (mean  $\pm$   
170 standard deviation) base substitutions per week. This rate is similar in ASCs of the small  
171 intestine, at  $16.1 \pm 3.1$  mutations per week, and is in line with the observation that human  
172 liver and intestinal ASCs have similar mutation accumulation rates *in vivo* (Blokzijl et al.  
173 2016). Loss of ERCC1 induced a twofold increase ( $45.5 \pm 3.0$  base substitutions per week)  
174 in the number of base substitutions in ASCs of the liver (Fig. 2A, Supplemental Fig. S2A).  
175 However, we did not observe a different mutation rate in small intestinal ASCs of *Ercc1*<sup>-Δ</sup>  
176 mice ( $21.0 \pm 4.9$  base substitutions per week) compared with WT small intestinal ASCs (Fig.  
177 2A, Supplemental Fig. S2A). We also observed a significant increase in the number of  
178 double base substitutions in liver ASCs lacking ERCC1 ( $q < 0.05$ , *t*-test, FDR correction; Fig.  
179 2B, Supplemental Fig. S2B, Supplemental Table S3). *Ercc1*<sup>-Δ</sup> liver ASCs acquire  $0.49 \pm 0.06$   
180 double base substitutions per week, while WT liver ASCs acquire only  $0.05 \pm 0.04$  double  
181 base substitutions per week. Again, we did not observe this difference between WT and

182 mutant ASCs of the small intestine ( $0.07 \pm 0.10$  and  $0.07 \pm 0.07$  per week, respectively). The  
183 increased number of double base substitutions in the liver ASCs remained significant after  
184 normalizing for the total number of base substitutions ( $q < 0.05$ ,  $t$ -test, FDR correction;  
185 Supplemental Fig. S2C), indicating a liver-specific enrichment of double base substitutions in  
186 *Ercc1*<sup>-Δ</sup> ASCs compared with WT.

187 In addition to the 4,238 base substitutions, we identified 2,116 small insertions and  
188 deletions (indels) and 21 larger deletions ( $\geq 100$  bp) in the autosomal genome of the 11  
189 clonal ASC samples (Supplemental Table S2). As opposed to the base substitutions, we  
190 observed similar indel numbers for WT and *Ercc1*<sup>-Δ</sup> ASCs of both tissues (Fig. 2C,  
191 Supplemental Fig. S2D). Of note, accurate identification of indels is more challenging than  
192 base substitutions, and as a result, these calls may contain more false positives. ASCs in the  
193 small intestine and liver of the mice acquire approximately  $13.3 \pm 3.4$  indels per week,  
194 independent of *Ercc1* mutation status. Likewise, loss of ERCC1 did not influence the number  
195 or type of structural variations (SVs) in ASCs of the small intestine and the liver (Fig. 2D,  
196 Supplemental Fig. S2E, Supplemental Table S2). Each mouse ASCs carried 0 - 6 deletions  
197 (median length of 539 bp; Supplemental Table S4). Finally, a genome-wide copy-number  
198 profile was generated to identify chromosomal gains and losses. These profiles indicated  
199 that all WT and *Ercc1*<sup>-Δ</sup> ASCs were karyotypically stable during life (Supplemental Fig. S3).  
200 Nevertheless, some subclonal aneuploidies were detected in a WT as well as an *Ercc1*<sup>-Δ</sup>  
201 liver organoid sample, which are most likely culturing artefacts that occurred *in vitro* after the  
202 clonal step irrespective of *Ercc1* mutation status.

203



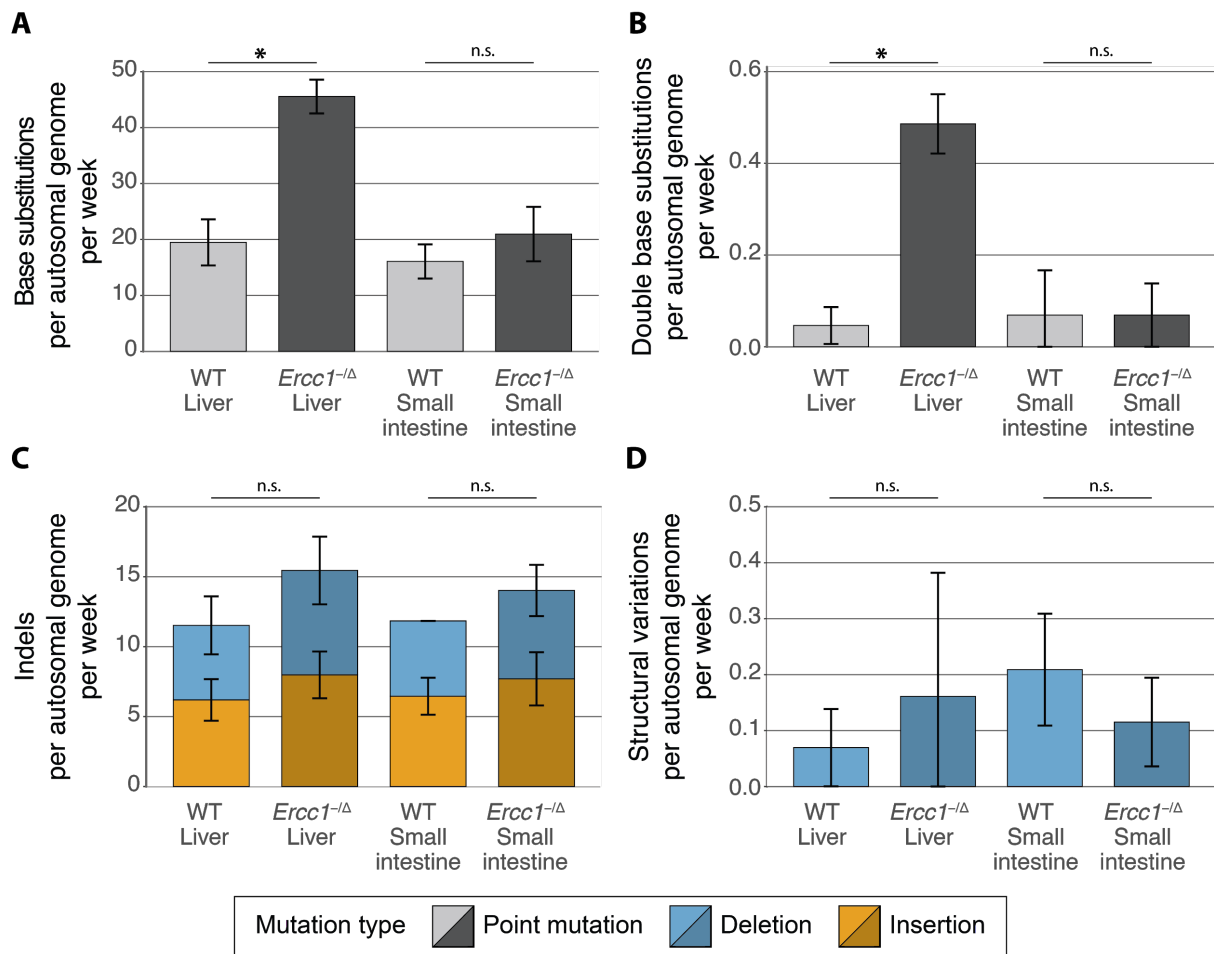

204

205 **Figure 2.** Somatic mutation rates in the genomes of ASCs from liver and small intestine of  
 206 WT and *Ercc1*<sup>-Δ</sup> mice. (A) Base substitutions, (B) double base substitutions, (C) indels, and  
 207 (D) SVs acquired per autosomal genome per week in ASCs of WT liver (n = 3), *Ercc1*<sup>-Δ</sup> liver  
 208 (n = 3), WT small intestine (n = 2), and *Ercc1*<sup>-Δ</sup> small intestine (n = 3). Error bars represent  
 209 standard deviations. Asterisks represent significant differences ( $p < 0.05$ , two-sided *t*-test,  
 210 FDR correction). n.s. : non-significant ( $p \geq 0.05$ , two-sided *t*-test, FDR correction).

211

## 212 **Loss of NER protein ERCC1 induces Signature 8 mutations in mouse ASCs**

213 To further dissect the mutational consequences of NER-deficiency, we characterized the  
 214 mutation spectra in the mouse ASCs. Regardless of tissue-type, the mutation spectra of all  
 215 assessed ASCs are predominantly characterized by C:G > A:T mutations and C:G > T:A  
 216 mutations (Fig. 3A). However, the mutation spectra of NER-proficient and NER-deficient

217 ASCs differed significantly for both tissues ( $q < 0.05$ ,  $X^2$ -test, FDR correction). Indeed, there  
218 are some notable differences, such as an increased contribution of T:A > A:T mutations in  
219 *Ercc1*<sup>-Δ</sup> ASCs compared with WT ASCs (Fig. 3A).

220 To gain insight into these differences, we generated 96-channel mutational profiles of  
221 all ASCs (Supplemental Fig. S4, Supplemental Fig. S5) and assessed the contribution of  
222 each COSMIC mutational signature (<http://cancer.sanger.ac.uk/cosmic/signatures>) to the  
223 average 96-channel mutational profile (centroid) per group (Supplemental Fig. S6B). We  
224 could reconstruct the original centroids well with the 30 COSMIC signatures, as the  
225 reconstructed centroids are highly similar to the original centroids for all four ASC groups  
226 (average cosine similarity = 0.95, Supplemental Fig. S6A). The contribution of the COSMIC  
227 signatures is significantly different between NER-proficient and NER-deficient ASC groups  
228 for both liver and small intestine ( $d > d_{WT_{0.05}}$  and  $d > d_{MUT_{0.05}}$ , bootstrap resampling method,  
229 see Methods, Supplemental Fig. S6C-D).

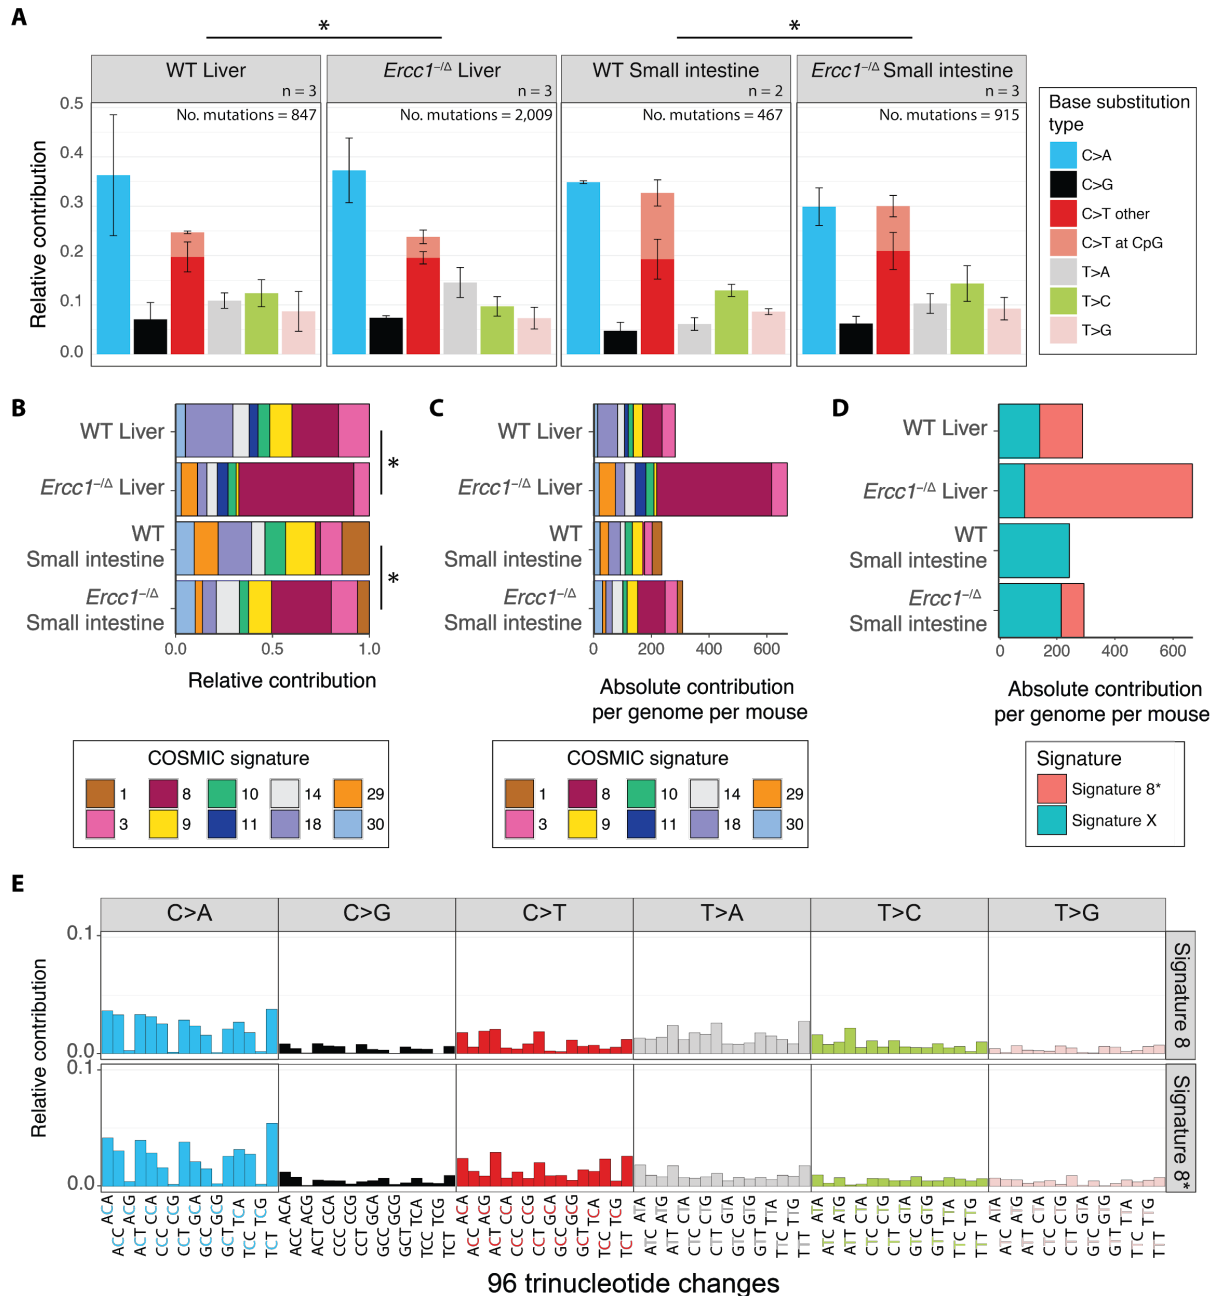

230

231 **Figure 3.** Mutational patterns of base substitutions acquired in the genomes of ASCs from

232 liver and small intestine of WT and *Ercc1*<sup>Δ</sup> mice. (A) Mean relative contribution of the

233 indicated mutation types to the mutation spectrum for each mouse ASC group. Error bars

234 represent standard deviations. The total number of mutations, and total number of ASCs (n)

235 per group is indicated. Asterisks indicate significant differences in mutation spectra ( $q <$

236 0.05,  $X^2$ -test, FDR correction). (B) Relative contribution of the indicated COSMIC mutational

237 signatures to the average 96-channel mutational profiles of each mouse ASC group.

238 Asterisks indicate significantly different signature contributions,  $P$  values were obtained

239 using a bootstrap resampling approach (Methods, Supplemental Fig. S6E-F) (C) Absolute  
240 contribution of the indicated COSMIC mutational signatures to the average 96-channel  
241 mutational profiles of each mouse ASC group. (D) Absolute contribution of two mutational  
242 signatures that were identified by non-negative matrix factorization (NMF) analysis of the  
243 average 96-channel mutational profiles of each mouse ASC group. (E) Relative contribution  
244 of each indicated context-dependent base substitution type to mutational Signature 8 and  
245 Signature 8\*.

246

247 We subsequently reconstructed the 96-channel mutational profiles using the top 10  
248 contributing COSMIC mutational signatures (Fig. 3B-C). We could reconstruct the centroids  
249 comparably well using this subset of 10 COSMIC signatures (average cosine similarity =  
250 0.95, Supplemental Fig. S6A). The 96-channel mutational profiles of NER-deficient liver  
251 ASCs not only closely resemble Signature 8 (cosine similarity of 0.92; Supplemental Fig.  
252 S7), but Signature 8 can almost fully explain the increase in base substitutions in NER-  
253 deficient liver ASCs (Fig. 3C). The number of Signature 8 mutations is also increased in all  
254 small intestinal ASCs of *Ercc1*<sup>-Δ</sup> mice compared with WT small intestinal ASCs (Fig. 3C).  
255 This finding shows that NER-deficiency can result in elevated numbers of Signature 8  
256 mutations in ASCs, regardless of tissue-type.

257 In addition, we performed an unbiased signature analysis by extracting two  
258 mutational signatures *de novo* from the mouse mutation catalogs using non-negative matrix  
259 factorization (NMF) (Supplemental File S3, Supplemental Fig. S8). One of the identified  
260 signatures, Signature X, contributes approximately 100 mutations to liver ASCs and 200  
261 mutations to small intestinal ASCs, in both WT and *Ercc1*<sup>-Δ</sup> mice (Fig. 3D), suggesting that  
262 this signature represents a mutational process that is generally active in mouse ASCs. In line  
263 with this, Signature X is highly similar to 96-channel mutational profiles of ASCs of the small  
264 intestine of old mice (Behjati et al. 2014) (cosine similarity = 0.95, Supplemental Fig. S8B).  
265 As expected, this mouse signature is not similar to any of the known COSMIC signatures  
266 identified in human tumor sequencing data (Supplemental Fig. S8B). The other signature,

267 Signature 8\*, is highly similar to COSMIC Signature 8 (cosine similarity = 0.91; Fig. 3E,  
268 Supplemental Fig. S8B) and has an increased contribution in *Ercc1*<sup>-Δ</sup> liver ASCs compared  
269 with WT (Fig. 3D; Supplemental Fig. S8C). Moreover, the contribution of Signature 8\*  
270 mutations is also increased in *Ercc1*<sup>-Δ</sup> small intestinal ASCs in comparison to WT small  
271 intestinal ASCs (Fig. 3D; Supplemental Fig. S8C). These findings confirmed that NER-  
272 deficiency results in base substitutions that show a 96-channel profile similar to COSMIC  
273 Signature 8.

274 Mutations are distributed non-randomly throughout the genome in cancer cells and in  
275 human ASCs (Schuster-Böckler and Lehner 2012; Blokzijl et al. 2016). NER is one of the  
276 pathways that is suggested to underlie this non-random distribution of mutations (Perera et  
277 al. 2016; Zheng et al. 2014). Firstly, NER-activity has been linked to a local enrichment of  
278 mutations at gene promoters (Perera et al. 2016). However, we do not observe any  
279 significant differences in the depletion of mutations in promoters, promoter-flanking, and  
280 enhancer regions between NER-proficient and -deficient ASCs (Supplemental Fig. S9A).  
281 Secondly, TC-NER results in a depletion of mutations in expressed genes, as this pathway  
282 repairs lesions on the transcribed strand during transcription (Pleasance et al. 2010).  
283 Mutations are indeed depleted in genic regions of NER-proficient WT mouse ASCs, but the  
284 depletion is not significantly different in NER-deficient ASCs (n.s., Poisson test, FDR  
285 correction; Supplemental Fig. S9A). Moreover, the average expression levels of genes in  
286 which the somatic mutations are located do not differ between *Ercc1*<sup>-Δ</sup> and WT ASCs (n.s.,  
287 *t*-test, FDR correction; Supplemental Fig. S9B), suggesting that *Ercc1*<sup>-Δ</sup> ASCs do not  
288 accumulate more mutations in expressed genes. Finally, there are no obvious changes in  
289 transcriptional strand bias, although the mutation numbers are too low to be conclusive  
290 (Supplemental Fig. S9C). NER-deficiency thus influences both the mutation load and  
291 mutation type, but not the genomic distribution of the observed base substitutions in mouse  
292 ASCs, suggesting that the contribution of TC-NER in the observed mutational consequences  
293 is minimal in these cells.

294

295 **Loss of GG-NER protein XPC induces Signature 8 mutations in human ASCs**

296 To identify a potential causal relationship between NER-deficiency and Signature 8 in human  
297 ASCs, we generated a human GG-NER deficient  $XPC^{KO}$  ASC using CRISPR-Cas9 gene-  
298 editing in a human small intestinal organoid culture (Fig. 4A). After confirming absence of  
299 XPC protein (Fig. 4B), we passaged the  $XPC^{KO}$  clone for approximately 2 months to allow  
300 the accumulation of sufficient mutations for downstream analyses. Subsequently, we derived  
301 subclonal cultures of single ASCs and expanded these until sufficient DNA could be isolated  
302 for WGS. This approach allowed us to catalog the mutations that specifically accumulated  
303 between the two clonal expansion steps in the absence of XPC (Supplemental Fig. S10A)  
304 (Drost et al. 2017; Blokzijl et al. 2016; Jager et al. 2018). As a control, WGS data of three  
305 previously-established  $XPC^{WT}$  organoid cultures of the same human donor was used  
306 (Blokzijl et al. 2016).

307 Similar to the  $Ercc1^{-\Delta}$  mouse ASCs, loss of XPC in human ASCs induced an  
308 increase in the genome-wide number of base substitutions acquired per week. (Fig. 4C,  
309 Supplemental Table S5). In addition, the number of double base substitutions acquired per  
310 week was approximately 17 times higher (Fig. 4D, Supplemental Table S5, Supplemental  
311 Table S6). We did not observe a marked change in the genomic distribution of acquired  
312 mutations as a result of  $XPC$  deletion in human ASCs, nor a change in transcriptional strand  
313 bias (Supplemental Fig. S10C-D). In total, approximately 39% of the increase in base  
314 substitutions in the  $XPC^{KO}$  ASC can be explained by Signature 8 (Fig. 4E, Supplemental Fig.  
315 S10B), confirming that NER-deficiency can cause an increase in the number of Signature 8  
316 mutations, independent of tissue-type or species.

317

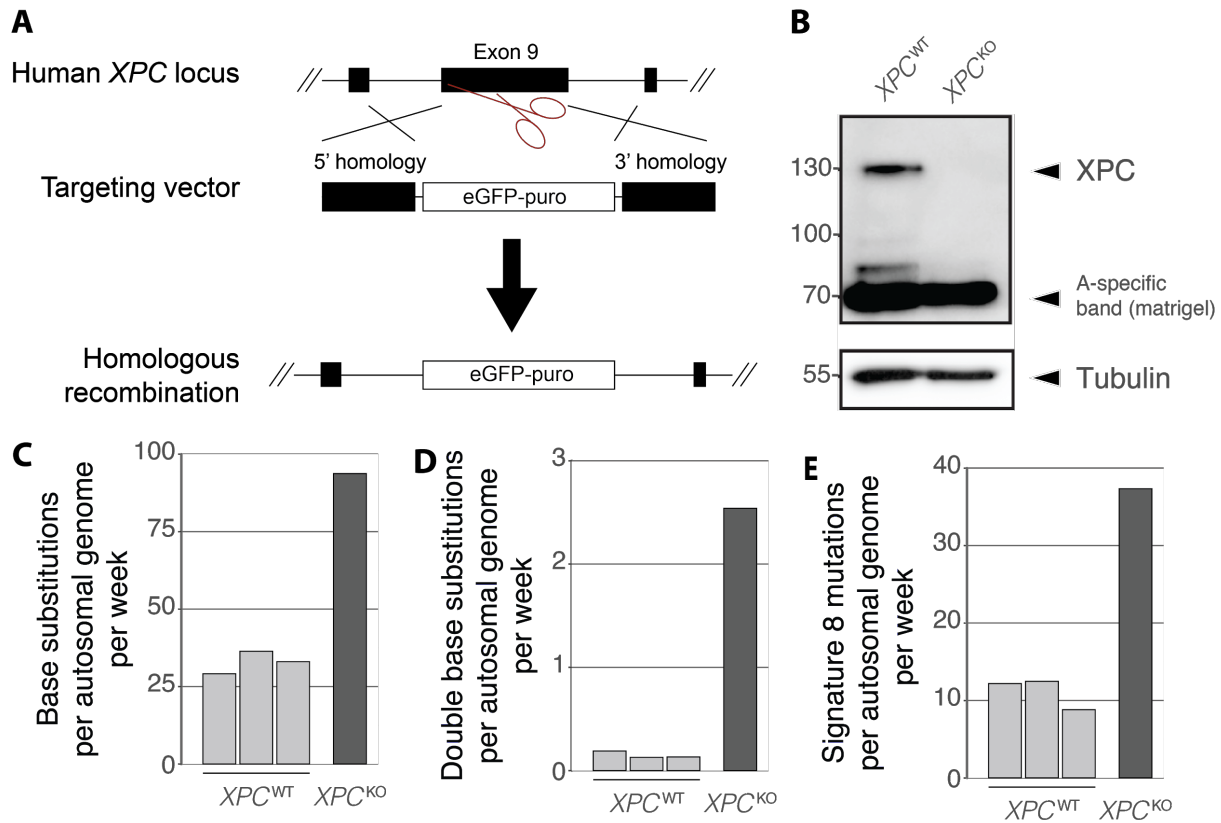

318

319 **Figure 4.** Mutational consequences of *XPC*<sup>KO</sup> in human intestinal organoid cultures *in vitro*.

320 (A) Targeting strategy for the generation of *XPC*<sup>KO</sup> organoid cultures using CRISPR-Cas9

321 gene-editing. (B) Western blot analysis of XPC in human *XPC*<sup>WT</sup> and *XPC*<sup>KO</sup> organoids. (C)

322 Number of base substitutions, (D) double base substitutions, and (E) Signature 8 mutations

323 acquired per autosomal genome per week in human *XPC*<sup>WT</sup> ASCs (n = 3) and an *XPC*<sup>KO</sup>

324 ASC (n = 1) *in vitro*.

325

### 326 Detecting NER-deficiency in human breast cancers genomes

327 To identify whether NER-deficiency can be linked to an increase in Signature 8 mutations in

328 human cancer as well, we looked into publicly available whole-genome sequencing data of

329 344 breast tumors (Nik-Zainal et al. 2016). Approximately 70% of these tumors have

330 accumulated Signature 8 mutations (Nik-Zainal et al. 2016). NER-status was predicted by

331 assessing the presence of protein-coding mutations and the copy number status of 66 NER-

332 genes (Pearl et al. 2015). NER-deficient samples were defined as being hit by a biallelic

333 loss-of-function mutation in at least one of the NER-genes. We excluded 274 samples with a

334 mutation in one copy of any NER-gene from our analysis, as it is not possible to reliably  
 335 predict the NER-status of these samples. By these definitions, we identified 27 NER-  
 336 deficient samples and 43 NER-proficient samples.

337 NER-proficient and NER-deficient breast cancers have accumulated a median of  
 338 3,399 base substitutions (mean 3,968, standard deviation 2,708) and 4,368 base  
 339 substitutions (mean 6,405, standard deviation 6,666) per sample, respectively  
 340 (Supplemental Fig. S11A). To characterize whether NER-status affects the accumulation of  
 341 Signature 8 mutations (<http://cancer.sanger.ac.uk/cosmic/signatures>), 96-channel mutational  
 342 profiles of the somatic mutations were generated for all 344 breast tumors (Fig. 5A) and the  
 343 contribution of each COSMIC mutational signature was assessed. 12 COSMIC mutational  
 344 signatures contributed to <10% of the mutational profiles of all 344 tumors and were  
 345 therefore excluded from subsequent analyses. The mutational profiles of the 70 breast  
 346 tumors with predicted NER-status (Fig. 5A) were reconstructed using the remaining 18  
 347 mutational signatures. In line with previous observations, NER-deficient tumors have  
 348 acquired 208 additional Signature 8 mutations in comparison to NER-proficient tumors (Fig.  
 349 5B;  $P = 0.02$ , Wilcoxon rank-sum test). Furthermore, Signature 8 has the largest effect size  
 350 of all 18 COSMIC mutational signatures (Supplemental Fig. S11B).

351

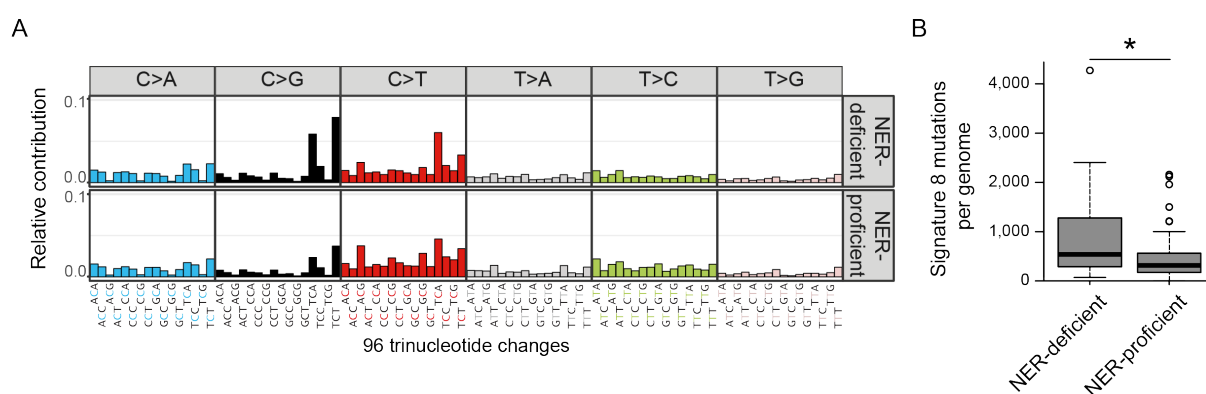

352

353 **Figure 5.** Mutation accumulation in predicted NER-deficient and NER-proficient breast  
 354 cancer whole-genomes. (A) Relative contribution of each indicated context-dependent base  
 355 substitution type to the average 96-channel mutational profiles of NER-deficient and NER-



356 proficient breast cancer samples. (B) Number of Signature 8 mutations in NER-deficient and  
357 NER-proficient breast cancer whole-genomes ( $n = 27$  and  $n = 43$ , respectively). Asterisk  
358 indicates significant difference ( $P < 0.05$ , Wilcoxon rank-sum test).

359

## 360 **DISCUSSION**

361 We exploited mouse knockouts, organoid culturing, CRISPR-Cas9 gene-editing, WGS, and  
362 mutational signature analyses to study the genome-wide mutational consequences of NER-  
363 deficiency in individual ASCs of human and mice. Our results show that loss of ERCC1  
364 induces a significant increase in the accumulation of base substitutions in liver ASCs, but not  
365 in small intestinal ASCs. Interestingly, the mutational increase coincides with the tissue-  
366 specific pathological aging phenotype observed in *Ercc1*<sup>-Δ</sup> mice (Dollé et al. 2011; Gregg et  
367 al. 2012). A possible explanation for this difference between tissues is that liver ASCs might  
368 be more dependent on DNA repair facilitated by ERCC1 compared with small intestinal  
369 ASCs, e.g. as a result of tissue-specific mutagen exposure. In line with this, WT liver ASCs  
370 show a higher basal expression of *Ercc1* and other NER genes compared with WT small  
371 intestinal ASCs. However, the transcription levels of DNA repair components do not  
372 necessarily reflect DNA repair-activity, due to post-transcriptional regulation (Naipal et al.  
373 2015). Alternatively, liver and small intestinal ASCs might cope differently with unrepaired  
374 DNA damage as a result of loss of ERCC1, such as the utilization of alternative DNA repair  
375 mechanisms, like translesion synthesis (TLS) polymerases, to bypass polymerase-blocking  
376 lesions, or differential induction of apoptosis or senescence.

377 ERCC1 is involved in multiple DNA repair pathways, including TC-NER, GG-NER,  
378 SSA, and crosslink repair. Previously, it has been shown that SSA- and crosslink repair-  
379 deficiencies result in increased number of indels and SVs in mice, whereas NER-deficiency  
380 introduces base substitutions (Dollé et al. 2006). Since we only observe an increase in base  
381 substitutions, NER-deficiency is likely responsible for the mutational consequences of loss of  
382 ERCC1 in liver ASCs *in vivo*. If TC-NER-deficiency underlies the differential mutation  
383 accumulation, this would be reflected by an increase in mutations in expressed genes in

384 *Ercc1*<sup>-Δ</sup> mice. However, WT and *Ercc1*<sup>-Δ</sup> cells show a similar depletion of mutations in  
385 genes, indicating that the observed mutational consequences of impaired ERCC1 is rather  
386 an effect of defective GG-NER. In line with this, we show that GG-NER-deficiency can also  
387 induce an increase in the number of base substitutions in a human small intestinal organoid  
388 culture that is deleted for GG-NER component *XPC*. More specifically, the increased base  
389 substitution load can be largely explained by an increased contribution of Signature 8 in both  
390 systems. In line with our observations, a mutational signature similar to Signature 8 has  
391 been shown to increase with age in the neurons of NER-deficient patients (Lodato et al.  
392 2017).

393       Until now, the etiology of Signature 8 was unknown  
394 (<http://cancer.sanger.ac.uk/cosmic/signatures>). As Signature 8 mutations are also detected  
395 in healthy human and mouse ASCs (Fig. 3C, Fig. 4E), this signature most likely represents a  
396 mutagenic process that is generally active in normal cells and not repaired 100% effective.  
397 Signature 8 is characterized by C:G > A:T mutations and is associated with double base  
398 substitutions (Alexandrov et al. 2013; Nik-Zainal et al. 2016). C:G > A:T mutations have  
399 been linked to several processes, including oxidative stress (Kamiya et al. 1995; Degtyareva  
400 et al. 2013). Consistently, organoid culturing causes mutations indicative of high oxidative  
401 stress (Blokzijl et al. 2016). Interestingly, NER has been suggested to play a role in the  
402 repair of tandem DNA lesions that result from oxidative stress (Bergeron et al. 2010; Cadet  
403 et al. 2012). If left unrepaired, these lesions can block regular DNA polymerases, but can be  
404 bypassed by error-prone TLS polymerases, resulting in increased incorporation of tandem  
405 mutations (Cadet et al. 2012). Moreover, it has been shown that oxidative stress results in  
406 increased induction of double base substitutions in NER-deficient human fibroblasts (Lee  
407 2002). In line with this, we observe a significant increase in the double base substitution load  
408 in mouse liver ASCs and a similar trend in the human ASC culture as a result of NER-  
409 deficiency, yet the number of double base substitutions is much lower than single base  
410 substitutions. Thus Signature 8 could reflect oxidative DNA damage bypassed by TLS.

411           Although NER-deficiency does not affect the base substitution load in the mouse  
412 small intestine, it does result in an increased contribution of Signature 8 mutations. This is in  
413 clear contrast to mouse liver ASCs, where NER-deficiency has both a qualitative and  
414 quantitative consequence on the accumulation of base substitutions. More specifically, the  
415 absolute contribution of Signature 8 mutations is similar in WT liver and *Ercc1*<sup>-Δ</sup> small  
416 intestinal ASCs. This clearly demonstrates that DNA-repair deficiency can have tissue-  
417 specific consequences, but also indicates that the absolute contribution of Signature 8  
418 mutations should be compared to the basal contribution in the same tissue in order to detect  
419 NER-deficiency.

420           We did not observe a notable contribution of signatures that have been previously  
421 observed in liver cancer in ASCs of *Ercc1*<sup>-Δ</sup> livers  
422 (<http://cancer.sanger.ac.uk/cosmic/signatures>) (Supplemental Fig. S6B). This finding  
423 suggests that the mutational processes that underlie these signatures are only active after  
424 oncogenic transformation, or that mutagen exposure in liver cancer (progenitor) cells is  
425 different from *in vivo* mouse ASCs and *in vitro* human ASCs. Liver cancer-specific Signature  
426 24, for example, is associated with Aflatoxin intake (Huang et al. 2017), a substance to  
427 which our mice and organoids were not exposed. In addition, Signature 1 and Signature 5,  
428 which have been previously associated with age (Blokzijl et al. 2016; Alexandrov et al.  
429 2015), did not have an increased contribution in the ASCs of progeroid *Ercc1*<sup>-Δ</sup> mice. Finally,  
430 a high contribution of mutational Signature 5 has been linked to the presence of somatic  
431 mutations in *ERCC2*, a key factor in both TC-NER and GG-NER, in human urothelial cancer  
432 (Kim et al. 2016; Iyama and Wilson 2013). As mentioned however, we did not observe an  
433 increase in Signature 5 contribution in the ASCs without ERCC1 or XPC. This discrepancy in  
434 mutational consequences could reflect various differences between these systems, such as  
435 different effects of the mutations on protein function, distinct roles of the proteins, or tumor-  
436 and/or tissue-specific activity of mutagenic damage and/or DNA repair processes. In our  
437 study, we deleted specific NER components in an otherwise normal genetic background,

438 providing us with the unique opportunity to directly characterize the mutational  
439 consequences of NER-deficiency.

440 The challenge of coupling mutational signatures to mutational processes based on  
441 genome sequencing data of tumors is illustrated by our analyses of the breast cancer  
442 genomes. As the number of mutations attributed to a signature typically increases at a  
443 higher mutational load and the mutational loads differ greatly between tumor types  
444 (Alexandrov et al. 2013), it is important to compare signature contributions between samples  
445 within a single tumor type. However, the majority of the breast cancer samples (~80%)  
446 carried a single mutation in a NER-gene and since the other copy might be inactivated  
447 through e.g. epigenetic silencing, these samples were excluded from the analysis. This  
448 resulted in a low sample size. Nonetheless, genomes of NER-deficient breast cancer  
449 patients show a higher number of Signature 8 mutations, which is in line with our  
450 observations in the ASCs. Further optimization of mutational signature definitions may aid to  
451 discriminate NER-deficient from NER-proficient tumors fully.

452 Determination of the NER-capacity of tumors can be important for precision  
453 medicine, as it has been shown that tumors with mutations in NER genes (Stubbert et al.  
454 2010; Van Allen et al. 2014; Amable 2016; Zhang et al. 2017), and tumors with low  
455 expression of *ERCC1* (Olaussen et al. 2006; Li et al. 2000; Amable 2016) are sensitive to  
456 cisplatin treatment. However, translation of these findings into the clinical setting has been  
457 challenging, because connecting tumor biopsy mRNA levels and immunohistochemistry  
458 measurements to NER-activity remains an unresolved issue (Bowden 2014), and  
459 interpreting the effects of mutations in DNA repair genes on NER-capacity is challenging.  
460 Rather than looking for the presence of causal events, mutational catalogs can be used as a  
461 functional readout of NER-capacity in tumors. Here, we show that NER-deficiency can  
462 induce an increase in Signature 8 mutations in both mouse and human ASCs. Signature 8 is  
463 found in medulloblastoma, bladder cancer, bone cancer, lung squamous cell carcinoma,  
464 ovarian cancer, pancreatic cancer and prostate cancer (Alexandrov et al. 2013, 2018).  
465 Furthermore, Signature 8 contributes to the mutational profile of the majority of breast cancer

466 tumors (Nik-Zainal et al. 2016; Alexandrov et al. 2013). Our results show that, besides the  
467 mutational status of NER genes, an increase in the number of Signature 8 mutations with  
468 respect to the normal number of Signature 8 mutations in a cancer type might serve as a  
469 novel biomarker for (GG-)NER-deficiency and has the potential to guide treatment decision.  
470 Clinical studies will be required to demonstrate the added predictive value of Signature 8  
471 mutations for NER-deficiency and/or treatment response.

472

## 473 **METHODS**

### 474 **Mouse tissue material**

475 *Ercc1*<sup>-Δ</sup> mice were generated and maintained as previously described (Vermeij et al., 2016).  
476 Briefly, by crossing *Ercc1*<sup>Δ/+</sup> (C57BL6J or FVB background) with *Ercc1*<sup>+/-</sup> mice (FVB or  
477 C57BL6J background), *Ercc1*<sup>-Δ</sup> mice were generated in a uniform F1 C57BL6J/FVB hybrid  
478 background. Wild type F1 littermates were used as controls. Animals were housed in  
479 individually ventilated cages under specific pathogen-free conditions in a controlled  
480 environment (20–22 °C, 12 h light : 12 h dark cycle). Experiments were performed in  
481 accordance with the Principles of Laboratory Animal Care and with the guidelines approved  
482 by the Dutch Ethical Committee in full accordance with European legislation.

483 We used three 15-week old female *Ercc1*<sup>-Δ</sup> mice and three female WT littermates for  
484 our experiments. Tails were harvested and stored at -20°C. Livers and small intestines were  
485 harvested and kept on ice in Adv+++ medium (Advanced DMEM/F-12 with 1% GlutaMAX,  
486 HEPES 10 mM and 1% penicillin/streptomycin) for a few hours until further processing.

487

### 488 **Human tissue material**

489 Endoscopic biopsies were performed at the University Medical Center Utrecht and the  
490 Wilhelmina Children's Hospital. The patients' informed consent was obtained and this study  
491 was approved by the ethical committee of University Medical Center Utrecht.

492

493 **Generation of clonal *Ercc1*<sup>Δ</sup> and WT mouse organoid cultures**

494 Single liver ASCs were isolated from livers as described previously (Kuijk et al. 2016). Liver  
495 organoid cultures were initiated by culturing the liver ASCs in BME overlaid with mouse liver  
496 culture initiation medium (50% Adv+++ medium, 35% WNT3A conditioned medium  
497 (produced in house), 5% NOGGIN conditioned medium (produced in house), 5% RSPO1  
498 conditioned medium (produced in house), 1x B27 without retinoic acid, 1x N2, 1x Primocin,  
499 10mM Nicotinamide, 0.625mM N-acetylcysteine, 100ng/ml FGF-10, 10μM ROCKi, 50 ng/ml  
500 HGF, 10nM Gastrin, and 50ng/ml hEGF). 1.5 week after culture initiation, clonal organoid  
501 liver cultures were generated and expanded according to protocol (Jager et al. 2018) in  
502 mouse liver expansion medium (90% Adv+++ medium, 5% RSPO1 conditioned medium  
503 (produced in house), 1x B27 without retinoic acid, 1x N2, 1x Primocin, 10mM Nicotinamide,  
504 0.625mM N-acetylcysteine, 100ng/ml FGF-10, 50 ng/ml HGF, 10nM Gastrin, and 50ng/ml  
505 hEGF).

506 Crypts were isolated from small intestines as described previously (Sato et al. 2009).  
507 Small intestinal organoid cultures were initiated by culturing the small intestinal ASCs in  
508 matrigel overlaid with mouse small intestine medium (50% WNT3A conditioned medium  
509 (produced in house), 30% Adv+++ medium, 10% NOGGIN conditioned medium (produced in  
510 house), 10% RSPO1 conditioned medium (produced in house), 1x B27, 1x hES Cell Cloning  
511 & Recovery Supplement, 1x Primocin, 10μM ROCKi, 1.25mM N-acetylcysteine, and 50ng/ml  
512 hEGF). Clonal small intestinal organoid cultures were generated by picking single organoids  
513 manually and clonally expanding these organoid cultures according to protocol in mouse  
514 small intestine medium (Jager et al. 2018). Culture expansion failed for the small intestine of  
515 mouse WT1.

516

517 **Generation of a clonal and subclonal *XPC*<sup>KO</sup> organoid culture**

518 Clonal *XPC*<sup>KO</sup> organoid cultures were generated from a small intestinal bulk organoid culture  
519 derived previously (Blokzijl et al. 2016) using the CRISPR-Cas9 gene-editing technique as  
520 described in (Drost et al. 2017). One clonal human *XPC*<sup>KO</sup> organoid culture was obtained

521 and cultured for 72 days in human small intestinal organoid medium (50% WNT3A  
522 conditioned medium (produced in house), 30% Adv+++ medium, 20% RSPO1 conditioned  
523 medium (produced in house), 1x B27, 1x Primocin, 1.25mM N-acetylcysteine, 0.5µM A83-  
524 01, 10µM SB202190, 100ng/ml recombinant Noggin, and 50ng/ml hEGF). Subsequently, a  
525 subclonal culture was derived according to protocol (Jager et al. 2018).

526

#### 527 **Western blot**

528 Protein samples from mouse organoid cultures were collected in Laemmli buffer and  
529 measured using the Qubit<sup>tm</sup> 3.0 Fluorometer (Thermo Fisher Scientific) with the Qubit<sup>tm</sup>  
530 Protein Assay Kit (Thermo Fisher Scientific, Q33211). Protein samples from human organoid  
531 cultures were collected in Laemmli buffer and measured using a Lowry protein assay. 30µg  
532 of protein per sample was run on a 10% SDS page gel. Subsequently, the proteins were  
533 transferred to a nitrocellulose membrane. After transfer, the membrane was blocked for 1  
534 hour using 5% ELK (Campina) at room temperature and subsequently incubated overnight  
535 with the primary antibody (ERCC1: Abcam, ab129267; XPC: Cell Signaling Technology;  
536 #12701). Secondary antibody was incubated 1 hour at room temperature, and subsequently  
537 proteins were visualized using the Amersham ECL Western blotting analysis system (GE  
538 Healthcare, RPN2109) and the Amersham Imager 600 system (GE Healthcare).

539

#### 540 **RNA sequencing and differential expression analysis of *Ercc1*<sup>-Δ</sup> and WT mouse** 541 **organoid cultures**

542 For each mouse (three *Ercc1*<sup>-Δ</sup> mice and three WT littermates), we performed RNA  
543 sequencing on one clonal organoid culture from the liver and the small intestine. An  
544 additional small intestinal organoid clone was sequenced of mice WT2 and WT3 to increase  
545 the amount of replicates for differential expression analysis, as culture expansion failed for  
546 the small intestine of WT1. Total RNA was collected in TRIzol and purified from all organoid  
547 cultures using the Qiasymphony (Qiagen). RNA libraries for Illumina sequencing were  
548 generated from 50 ng of poly-A selected mRNA using the Neoprep (Illumina) and sequenced



549 2 x 75 bp paired-end to approximately 3300 Million base pairs per sample with the Illumina  
550 NextSeq 500 at the Utrecht Sequencing Facility.

551 RNA sequencing reads were mapped with STAR v.2.4.2a to the mouse reference  
552 genome GRCm38. The BAM files were sorted with Sambamba v0.5.8 and reads were  
553 counted with HTSeq-count version 0.6.1p1 (default settings) to exons as defined in  
554 GRCm38v70.gtf (Ensembl). Non-uniquely mapped reads were not counted. Subsequently,  
555 DESeq v1.28.0 was used to normalize counts. DESeq nbinomTest was used to test for  
556 differential expression (1) of *Ercc1* between *Ercc1*<sup>-Δ</sup> and WT liver ASCs, (2) of *Ercc1*  
557 between *Ercc1*<sup>-Δ</sup> and WT small intestinal ASCs, (3) of 83 other DNA repair genes (Casorelli  
558 et al. 2006) between *Ercc1*<sup>-Δ</sup> and WT liver ASCs, and (4) between *Ercc1*<sup>-Δ</sup> and WT small  
559 intestinal ASCs, and (5) of 9 NER genes between the WT liver and WT small intestinal  
560 ASCs. Differentially expressed genes with  $q < 0.05$  (Benjamini-Hochberg FDR multiple-  
561 testing correction) were considered significant.

562

### 563 **WGS and read alignment**

564 DNA was isolated from mouse liver organoid cultures and mouse control (tail) samples using  
565 the genomic tip 20-G kit (Qiagen) and from mouse small intestinal organoid samples and the  
566 human *XPC*<sup>KO</sup> sample using the Qiasymphony (Qiagen). DNA libraries for Illumina  
567 sequencing were generated from 200 ng genomic DNA using standard protocols (Illumina)  
568 and sequenced 2 x 100 bp paired-end to 30X base coverage with the Illumina HiSeq Xten at  
569 the Hartwig Medical Foundation. The sequence reads of *XPC*<sup>KO</sup> were mapped to the  
570 GRCh37 human reference genome using using the Burrows–Wheeler Aligner (BWA) v0.7.5a  
571 (Li and Durbin 2009), with settings '-t 4 -c 100 -M'. The mapped data of clonal *XPC*<sup>WT</sup>  
572 organoids was previously generated in the study ('donor\_id' 6) (Blokzijl et al. 2016). The  
573 sequence reads of the mouse ASCs were mapped to the GRCm38 mouse reference  
574 genome using using the Burrows–Wheeler Aligner (BWA) v0.7.5a (Li and Durbin 2009), with  
575 settings '-t 4 -c 100 -M'. The WGS data of the tails confirmed that the *Ercc1*<sup>-Δ</sup>mice have



576 compound heterozygous mutations in *Ercc1* and the WT littermates do not (Supplemental  
577 Fig. S12).

578

### 579 **Callable genome**

580 The callable genome was defined for all sequenced samples using the GATK CallableLoci  
581 tool v3.4.46 (Van der Auwera et al. 2013) with default settings and additional optional  
582 parameters 'minBaseQuality 10', 'minMappingQuality 10',  
583 'maxFractionOfReadsWithLowMAPQ 20', and 'minDepth 20'. 'CALLABLE' regions were  
584 extracted from every output file. Subsequently, genomic regions that were callable (1) in the  
585 mouse organoid clone and the control (tail) sample, and (2) in the human organoid clone,  
586 subclone, and control (blood) were intersected to define a genomic region that is surveyed in  
587 all samples that were compared. Approximately  $90 \pm 1\%$  of the autosomal genome was  
588 surveyed in every mouse clone (Supplemental Table S2), and 73 - 88% of the autosomal  
589 genome was surveyed in each human subclone (Supplemental Table S5).

590

### 591 **Base substitution and indel calling**

592 For both human and mouse samples, base substitutions and indels were multi-sample called  
593 with GATK HaplotypeCaller v3.4.46 with default settings and additional options '-  
594 stand\_call\_conf 30 -stand\_emit\_conf 15' and GATK Queue v3.4.46. For mouse samples the  
595 quality of the calls was assessed using GATK VariantFiltration v3.4.46 with options 'QD <  
596 2.0, MQ < 40.0, FS > 60.0, HaplotypeScore > 13.0, MQRankSum < -12.5,  
597 ReadPosRankSum < -8.0' for base substitutions and 'QD < 2.0, FS > 200.0,  
598 ReadPosRankSum < -20.0' for indels, with additional options 'clusterSize 3' and  
599 'clusterWindowSize 35'. For human samples the quality of the calls was assessed using  
600 GATK VariantFiltration v3.4.46 with options 'QD < 2.0, MQ < 40.0, FS > 60.0,  
601 HaplotypeScore > 13.0, MQRankSum < -12.5, ReadPosRankSum < -8.0, MQ0 >= 4 &&  
602 ((MQ0 / (1.0 \* DP)) > 0.1), DP < 5, QUAL < 30, QUAL >= 30.0 && QUAL < 50.0, SOR > 4.0'  
603 for base substitutions and 'QD < 2.0, FS > 200.0, ReadPosRankSum < -20.0, MQ0 >= 4 &&

604 ((MQ0 / (1.0 \* DP)) > 0.1), DP < 5, QUAL < 30.0, QUAL >= 30.0 && QUAL < 50.0, SOR >  
605 10.0' for indels, with additional options 'clusterSize 3' and 'clusterWindowSize 10.

606

### 607 **Base substitution filtering**

608 To obtain high-quality catalogs of somatic base substitutions, we applied a comprehensive  
609 filtering procedure. For the mouse samples, we only considered positions on the autosomal  
610 genome that were callable (see "Callable genome") in both the organoid and control (tail)  
611 sample. We excluded positions at which indels were called, as these positions likely  
612 represent false-positive base substitution calls. Furthermore, we only included positions with  
613 a 'PASS' flag by GATK VariantFiltration, a GATK phred-scaled quality score  $\geq 100$ , a  
614 sample-level genotype quality of 99 in the organoid culture and  $\geq 10$  in the control (tail)  
615 sample, and a coverage of  $\geq 20X$  in the organoid and the tail sample. We subsequently  
616 excluded variants with any evidence in another organoid sample or control (tail) sample of  
617 the same mouse to remove germline variants. To exclude potentially missed germline  
618 events, we also removed positions that have any evidence in the organoid and/or control  
619 samples of the other mice. Finally, we excluded positions with a variant allele frequency  
620 (VAF) < 0.3 in the organoid sample to exclude mutations that were induced after the clonal  
621 step.

622 For the human samples, we only considered positions on the autosomal genome that  
623 were callable (see "Callable genome") in the control (blood) sample, clonal organoid and  
624 subclonal organoid culture. We considered mutations with a 'PASS' flag by GATK  
625 VariantFiltration and a GATK phred-scaled quality score  $\geq 100$ . For both the clonal and  
626 subclonal organoid cultures, all variants with evidence in the control (blood) sample were  
627 excluded, to remove germline variants. To exclude potentially missed germline events, we  
628 removed positions that are in the Single Nucleotide Polymorphism Database v137.b3730, or  
629 in a blacklist with positions that are recurrent in unmatched individuals (BED-file available  
630 upon request). Subsequently, for both the clonal and subclonal cultures, all variants with a  
631 VAF < 0.3 were excluded. Finally, the resulting somatic base substitution catalogs of the

632 clonal and subclonal cultures were compared and all events unique to the subclonal  
633 organoid were considered to be accumulated after the XPC deletion, that is: between the  
634 two sequential clonal expansion steps.

635

### 636 **Validation of base substitutions in *Ercc1*<sup>-Δ</sup> and WT mouse organoid cultures**

637 To independently validate all base substitution positions, new sequencing libraries were  
638 generated from DNA samples of all 11 mouse organoid cultures and of the tail of WT1 (DNA  
639 samples were isolated in 'WGS and read alignment') using the Twist Human Core Exome  
640 v1.3 Complete Kit. The libraries were pooled and size-selected twice using 0.55X and 0.8X  
641 AMPure XP beads. For all base substitutions, an enrichment probe of 120 bp was designed  
642 for both the reference and variant allele with a minimum number of repeats and with the  
643 base substitution position at least 10 bp from the end. The probes were produced by Twist  
644 Bioscience. Subsequently, the pooled libraries were enriched with the enrichment probes in  
645 two enrichment reactions using the Twist Human Core Exome v1.3 Complete Kit and  
646 sequenced 2 x 150 bp paired-end with the Illumina NextSeq 500 at the Utrecht Sequencing  
647 Facility. Base substitutions were called as described in 'Base substitution and indel calling'.  
648 Variants were considered true if they were called with a filter 'PASS' in 1 out of 12 samples.  
649 The remaining 220 variants were checked manually in IGV and considered true if they were  
650 found in 1 out of 12 samples at an allele frequency of > 10%. In total, 4,130/4,238 variants  
651 (97.5%) were confirmed using this approach (Supplemental file S2).

652

### 653 **Clonality of organoid cultures**

654 We validated whether the organoid samples were clonal based on the VAF of somatic base  
655 substitutions, before the final filter step (VAF < 0.3). Each cell acquires its own set of somatic  
656 mutations and the reads supporting a mutation will be diluted in the WGS data of non-clonal  
657 samples, resulting in a low VAF. After extensive filtering of somatic base substitutions, liver  
658 organoid samples from WT1, WT2, and *Ercc1*<sup>-Δ2</sup> showed a shift in the VAF-peak away from  
659 0.5 and therefore these samples were excluded from further analyses (Supplemental Fig.

660 S13). An additional liver organoid culture from these mice was sequenced and these  
661 samples were confirmed to be clonal (Supplemental Fig. S13).

662

### 663 **Double base substitutions**

664 We selected base substitutions from the filtered variant call format (VCF) files that were  
665 called on consecutive bases in the mouse or human reference genome. The double base  
666 substitutions were subsequently manually checked in the Integrative Genomics Viewer (IGV)  
667 to exclude double base substitutions present in the control sample, and/or with many base  
668 substitutions or indels in the region, as these are (likely) false positives.

669

### 670 **Indel filtration of *Ercc1*<sup>-Δ</sup> and WT mouse organoid cultures**

671 We only considered positions on the autosomal genome that were callable (see “Callable  
672 genome”) and had a sequencing depth of  $\geq 20X$  in both the organoid sample and the control  
673 (tail) sample. We excluded positions that overlap with a base substitution. Furthermore, we  
674 only considered positions with a filter ‘PASS’ from VariantFiltration, a GATK phred-scaled  
675 quality score  $> 250$  and a sample-level genotype quality of 99 in both the organoid sample  
676 and the control (tail) sample. We subsequently excluded Indels that are located within 50  
677 base pairs of an indel called in another organoid sample and indels with any evidence in  
678 another organoid sample or a control (tail) sample. Finally, we excluded positions with a VAF  
679  $< 0.3$  in the organoid sample.

680

### 681 **SV calling and filtration of *Ercc1*<sup>-Δ</sup> and WT mouse organoid cultures**

682 SVs were called with DELLY v0.7.2 with settings ‘type DEL DUP INV TRA INS’, ‘map-qual  
683 1’, ‘mad-cutoff 9’, ‘min-flank 13’, and ‘geno-qual 5’ (Rausch et al. 2012). We only considered  
684 SVs of at least 100 bp on the autosomal chromosomes that were called with a filter ‘PASS’,  
685 and a sample-specific genotype quality of at least 90 in the organoid culture and the control  
686 sample. We subsequently excluded positions with any evidence in the control (tail) sample.  
687 The filtered SVs were finally checked manually in IGV to reduce false-positives and we

688 excluded SVs present in the tail sample, with no visible change in the read-depth (for  
689 duplications and deletions), and/or with many base substitutions in the region.

690

### 691 **Genome-wide copy number profiles of *Ercc1*<sup>-Δ</sup> and WT mouse organoid cultures**

692 To generate a virtual karyotype, genome-wide copy number states were determined using  
693 FreeC v7.2 with settings 'ploidy 2', 'window 1000' and 'telocentromeric 50000' (Boeva et al.  
694 2012). Subsequently, the average copy number across bins of 500,000 bp was calculated  
695 and plotted to assess genome stability.

696

### 697 **Base substitution types**

698 We retrieved the base substitution types from all the filtered VCF files, converted them to the  
699 6 types of base substitutions that are distinguished by convention, and generated a mutation  
700 spectrum (the C>T changes at NpCpG sites are considered separately from C>T changes at  
701 other sites) for the four ASC groups (*Ercc1*<sup>-Δ</sup> liver, *Ercc1*<sup>-Δ</sup> small intestine, WT liver, and WT  
702 small intestine), as well as *XPC*<sup>KO</sup>, *XPC*<sup>WT1</sup>, *XPC*<sup>WT2</sup>, and *XPC*<sup>WT3</sup> ASCs. X<sup>2</sup>-tests were  
703 performed to determine whether the mutation spectra differ significantly between (1) mouse  
704 WT and *Ercc1*<sup>-Δ</sup> liver ASCs, and (2) mouse WT and *Ercc1*<sup>-Δ</sup> small intestinal ASCs. *P* values  
705 were corrected for multiple testing using Benjamini-Hochberg FDR correction, and  
706 differences in mutation rates between *Ercc1*<sup>-Δ</sup> and WT mouse ASCs with *q* < 0.05 were  
707 considered significant.

708 We retrieved the sequence context for all base substitutions to generate the 96-  
709 channel mutational profiles for each assessed ASC. Subsequently, the centroid of the 96-  
710 channel mutational profiles was calculated per mouse ASC group. Pairwise cosine  
711 similarities of all 96-channel mutational profiles and of all centroids were computed. We also  
712 calculated the cosine similarities of the 96-channel mutational profiles and centroids with all  
713 30 COSMIC mutational signatures (<http://cancer.sanger.ac.uk/cosmic/signatures>)  
714 (Supplemental Fig. S7). These analyses were performed with the R package  
715 MutationalPatterns (Blokzijl et al. 2018).

716

### 717 ***De novo* mutational signature extraction**

718 We extracted two signatures using non-negative matrix factorization (NMF) from the 96-  
719 channel mutational profiles of the mouse ASCs. Although the number of base substitutions is  
720 low for this dimension reduction approach, it does provide an unbiased method to  
721 characterize the mutational processes that have been active in the ASCs. Subsequently, we  
722 computed the absolute contribution of these *de novo* extracted signatures to the centroids of  
723 the mouse ASC groups. We also calculated the cosine similarity of these two mutational  
724 signatures to the 30 COSMIC mutational signatures  
725 (<http://cancer.sanger.ac.uk/cosmic/signatures>) and to the 96-channel centroid of six small  
726 intestinal ASCs from two old mice that was published previously (Behjati et al. 2014). These  
727 analyses were performed with MutationalPatterns (Blokzijl et al. 2018).

728

### 729 **Quantification of the contribution of COSMIC mutational signatures to the 96-channel** 730 **mutational profiles**

731 We estimated the contribution of the 30 COSMIC mutational signatures  
732 (<http://cancer.sanger.ac.uk/cosmic/signatures>) to the centroids of each mouse ASC group  
733 and to the 96-channel mutational profiles of the human organoids using MutationalPatterns  
734 (Blokzijl et al. 2018) (Supplemental Fig. S6B, Supplemental Fig. S10B). We ranked the  
735 COSMIC signatures based on the total contribution of these signatures to the centroids of  
736 the mouse samples. Next, we iteratively reconstructed the centroids of the ASC groups, first  
737 using the top 2 COSMIC signatures, and in each iteration the next COSMIC signature was  
738 included until all 30 signatures were used. The cosine similarity was calculated between the  
739 original and the reconstructed centroid for each mouse ASC group (Supplemental Fig. S6A).  
740 As expected, the addition of more signatures increases the similarity of the reconstructed  
741 centroids with the original centroids, but after 10 COSMIC signatures the cosine similarities  
742 plateau (Supplemental Fig. S6A). Therefore, we used the signature contribution with this  
743 subset of 10 COSMIC signatures to the centroids of the four ASC groups (Fig. 3B-C).

744

745 **Determination of the statistical significance of differences in signature contributions**

746 A bootstrap resampling - similar to that performed in (Zou et al. 2018) - was applied to  
747 generate 7,000 replicas of the 96-channel mutational profile of each WT liver ASC ( $n = 3$ ),  
748 which yielded 21,000 WT liver replicas in total. Subsequently, 3 replicas were randomly  
749 selected and the relative contribution of 30 COSMIC signatures was determined for their  
750 centroid. Euclidean distance  $d_{WT}$  was calculated between the relative signature contributions  
751 of the replicas centroid and that of the original centroid. This was repeated 10,000 times to  
752 construct a distribution of  $d_{WT}$  (Supplemental Figure 6C). Next, the threshold distance with  $P$   
753 value = 0.05,  $d_{WT_{0.05}}$ , was identified. The same approach was taken to generate 7,000  
754 replicas of each *Ercc1*<sup>-Δ</sup> (MUT) liver ASC ( $n = 3$ ) and construct a distribution of  $d_{MUT}$   
755 (Supplemental Figure 6C). The Euclidean distance  $d$  between the relative signature  
756 contributions of the original WT and *Ercc1*<sup>-Δ</sup> liver centroids were considered to be  
757 significantly different when  $d > d_{MUT}$  and  $d > d_{WT}$ . Similarly, bootstrap distributions were  
758 generated for WT and *Ercc1*<sup>-Δ</sup> (MUT) small intestine (Supplemental Figure 6D), with the  
759 exception that for the generation of the  $d_{MUT}$  distribution only 2 replicas were randomly  
760 selected in each permutation, as there are only 2 WT small intestinal ASC samples in the  
761 original set. Finally, we repeated the same analyses for the relative contributions of the  
762 subset of 10 COSMIC signatures for both liver (Supplemental Figure 6E) and small intestine  
763 (Supplemental Figure 6F).

764

765 **Enrichment or depletion of base substitutions in genomic regions**

766 To test whether the base substitutions appear more or less frequently than expected in  
767 genes, promoters, promoter-flanking, and enhancer regions, we loaded the UCSC Known  
768 Genes tables as TxDb objects for Mm10 (Team BC and Maintainer 2016) and Hg19  
769 (Carlson and Maintainer 2015), and the regulatory features for Mm10 and Hg19 from  
770 Ensembl using biomaRt (Durinck et al. 2005, 2009). We tested for enrichment or depletion of  
771 base substitutions in the genomic regions per ASC group (*Ercc1*<sup>-Δ</sup> liver, *Ercc1*<sup>-Δ</sup> small



772 intestine, WT liver, WT small intestine,  $XPC^{KO}$  and  $XPC^{WT}$ ) using a one-sided Binomial test  
773 with MutationalPatterns (Blokzijl et al. 2018), which corrects for the surveyed genomic areas  
774 (Supplemental Fig. S9A, Supplemental Fig. S10C). Two-sided Poisson tests were performed  
775 to test for significant differences in the ratio of base substitutions within a genomic region  
776 divided by the total number of base substitutions between (1) mouse WT and  $Ercc1^{-\Delta}$  liver  
777 ASCs and (2) mouse WT and  $Ercc1^{-\Delta}$  small intestinal ASCs (Supplemental Fig. S9A).  
778 Differences in mutation rates with  $q < 0.05$  (Benjamini-Hochberg FDR multiple-testing  
779 correction) were considered significant.

780 To test whether base substitutions occur more frequently in more highly expressed  
781 genes in the NER-deficient mouse ASCs, we first selected base substitutions that occurred  
782 within genes in the mouse ASCs. Per ASC group, we next determined the average Reads  
783 Per Kilobase per Million mapped reads (RPKM) of these genes. Two-sided  $t$ -tests were  
784 performed to test for significant difference in the average expression of genes that carry a  
785 somatic mutation between (1) mouse WT and  $Ercc1^{-\Delta}$  liver ASCs, and (2) mouse WT and  
786  $Ercc1^{-\Delta}$  small intestinal ASCs (Supplemental Fig. S9B). Differences in gene expression  
787 distributions with  $q < 0.05$  (Benjamini-Hochberg FDR multiple-testing correction) were  
788 considered significant.

789

### 790 **Transcriptional strand bias of base substitutions**

791 For the base substitutions within genes we determined whether the mutations are located on  
792 the transcribed or the non-transcribed strand. To this end, we determined whether the  
793 mutated “C” or “T” base is on the same strand as the gene definition, which is untranscribed,  
794 or the opposite strand, which is transcribed. We generated a 192-channel mutational profile  
795 per ASC group with the relative contribution of each mutation type with separate bars for the  
796 mutations on the transcribed and untranscribed strand, and calculated the significance of the  
797 strand bias using a two-sided Poisson test with MutationalPatterns (Supplemental Fig. S9C,  
798 Supplemental Fig. S10D) (Blokzijl et al. 2018). Furthermore, we performed two-sided  
799 Poisson tests to test whether there is a significant difference in strand bias per mutation type



800 between (1) mouse WT and *Ercc1*<sup>-Δ</sup> liver ASCs and (2) mouse WT and *Ercc1*<sup>-Δ</sup> small  
801 intestinal ASCs (Supplemental Fig. S9C). Differences in strand bias with an adjusted P-value  
802  $q < 0.05$  (Benjamini-Hochberg FDR multiple-testing correction) were considered significant.

803

#### 804 **Calculation and comparison of mutation rates**

805 To calculate the mutation rates per genome per week, we quantified the number of somatic  
806 base substitutions, double nucleotide mutations, indels, and SVs for each mouse ASC.  
807 Moreover, we quantified the number of base substitutions, double base substitutions and  
808 Signature 8 mutations for the human ASCs. All event counts were extrapolated to the entire  
809 autosomal genome using the callable genome length (see "Callable genome") for both  
810 mouse and human ASCs to correct for differences in the surveyed genome. Subsequently,  
811 the mutation rates were calculated by dividing the extrapolated number of mutations by the  
812 number of weeks in which the mutations were accumulated (WT and *Ercc1*<sup>-Δ</sup> mouse  
813 organoids: 16 weeks (15 weeks during life and 1 week *in vitro*); *XPC*<sup>WT</sup> human organoids:  
814 20.6 weeks; *XPC*<sup>KO</sup> human organoids 10.3 weeks). To determine the proportion of  
815 additionally accumulated mutations in the *XPC*<sup>KO</sup> culture that can be attributed to Signature 8  
816 in human ASCs, we first calculated the increase in base substitutions and the increase in  
817 Signature 8 mutations of *XPC*<sup>KO</sup> compared to *XPC*<sup>WT1</sup>, *XPC*<sup>WT2</sup>, and *XPC*<sup>WT3</sup> separately. We  
818 then divided the increase in Signature 8 mutations by the total increase in base substitutions.

819 Two-tailed *t*-tests were performed to determine whether the mutation rates differ  
820 significantly between (1) mouse WT and *Ercc1*<sup>-Δ</sup> liver ASCs, and (2) mouse WT and *Ercc1*<sup>-Δ</sup>  
821 small intestinal ASCs. Of note, these tests assume that the data is normally distributed.  
822 Differences in mutation rates between *Ercc1*<sup>-Δ</sup> and WT mouse ASCs with  $q < 0.05$   
823 (Benjamini-Hochberg FDR multiple-testing correction) were considered significant.

824

#### 825 **Analysis of mutational patterns and signatures in breast cancer whole-genome** 826 **sequences**

827 344 breast cancer samples with publicly available SNV, indels, and CNV calls obtained from  
828 tumor-normal samples were included in the analysis (Nik-Zainal et al, 2016). Samples with a  
829 biallelic inactivation (biallelic deletion, biallelic nonsense, splice site, nonsynonymous  
830 mutation or frameshift indel, or two or more independent mutations of these types) of at least  
831 one NER-related gene (66 genes, (Pearl et al. 2015); GTF2H5 was excluded because of  
832 missing CNV calls) are considered as NER-deficient. Samples with no copy number  
833 depletions and no variants other than intronic SNVs and indels in any of the 66 NER-related  
834 genes are considered as NER-proficient. The remaining 274 samples are considered as  
835 having unknown NER-ability.

836 The number of base substitutions was extracted from each VCF file and a Wilcoxon  
837 rank-sum test was performed to determine whether the number of base substitutions is  
838 different between NER-proficient and NER-deficient samples. The 96-channel mutational  
839 profile of each sample was generated as described in the section "Base substitution types".  
840 Subsequently, the 96-channel mutational profile of each sample was reconstructed using the  
841 30 mutational signatures from COSMIC, as described in the section "Quantification of the  
842 contribution of COSMIC mutational signatures to the 96-channel mutational profiles".  
843 Signatures with a contribution of < 10% in all 344 samples were excluded (signatures 4, 7,  
844 10, 11, 14, 15, 22-25, 27, 28), and the 96-channel mutational profiles were finally  
845 reconstructed using the remaining 18 signatures. The cosine similarity between the  
846 observed 96-channel mutational profile and the reconstructed profile was above 0.95 for all  
847 samples, which indicates a very good fit of the signatures.

848 Based on this, the number of mutations per signature was estimated for each  
849 sample. Then, for each signature, the number of mutations was compared between the  
850 NER-deficient and NER-proficient samples using the median difference (the median of all  
851 pairwise differences between NER-deficient and NER-proficient samples). A Wilcoxon rank-  
852 sum test was performed to determine whether the number of Signature 8 mutations differs  
853 significantly between NER-deficient and NER-proficient breast tumors. Signature 20 is

854 excluded from the analysis, because none of the NER-deficient or NER-proficient samples  
855 have a contribution of Signature 20.

856

## 857 **DATA ACCESS**

858 The sequencing data of the mouse samples have been deposited at the European  
859 Nucleotide Archive under accession number ERP021379. The sequencing data of the  
860 human samples have been deposited at the European Genome-Phenome archive under  
861 accession numbers EGAS00001001682 and EGAS00001002681. Filtered VCF files are  
862 freely available at <https://wgs11.op.umcutrecht.nl/NERdeficiency/>

863

## 864 **CODE AVAILABILITY**

865 All analysis scripts are available at <https://github.com/UMCUGenetics/NER-deficiency.git> or  
866 [https://github.com/johannabertl/BRCA\\_DNA\\_repair](https://github.com/johannabertl/BRCA_DNA_repair).

867

## 868 **ACKNOWLEDGEMENTS**

869 The authors would like to thank the the animal caretakers of the Erasmus MC for taking care  
870 of the mice and the Utrecht Sequencing Facility for providing the sequencing service and  
871 data. Utrecht Sequencing Facility is subsidized by the University Medical Center Utrecht,  
872 Hubrecht Institute and Utrecht University. This study was financially supported by the NWO  
873 Zwaartekracht program Cancer Genomics.nl.

874

## 875 **AUTHOR CONTRIBUTIONS**

876 M.J., E.K., M.V., N.B., and R.B. performed organoid culturing. N.B. and R.B. generated  
877 western blots and sequenced the organoid cultures. M.J., F.B., J.B., R.J., S.B., J.L., and  
878 R.B. performed bioinformatic analyses. M.J., F.B., E.K., J.S.P., J.H., J.P., R.B., and E.C.  
879 were involved in the conceptual design of this study. M.J., F.B., R.B., and E.C. wrote the  
880 manuscript.

881

882 **DISCLOSURE DECLARATION**

883 The authors have nothing to disclose.

884

885 **REFERENCES**

- 886 Aboussekhra A, Biggerstaff M, Shivji MK, Vilpo JA, Moncollin V, Podust VN, Protić M,  
887 Hübscher U, Egly JM, Wood RD. 1995. Mammalian DNA nucleotide excision repair  
888 reconstituted with purified protein components. *Cell* **80**: 859–868.
- 889 Adams PD, Jasper H, Lenhard Rudolph K. 2015. Aging-Induced Stem Cell Mutations as  
890 Drivers for Disease and Cancer. *Cell Stem Cell* **16**: 601–612.
- 891 Alexandrov LB, Jones PH, Wedge DC, Sale JE, Campbell PJ, Nik-Zainal S, Stratton MR.  
892 2015. Clock-like mutational processes in human somatic cells. *Nat Genet* **47**: 1402–  
893 1407.
- 894 Alexandrov LB, Ju YS, Haase K, Van Loo P, Martincorena I, Nik-Zainal S, Totoki Y, Fujimoto  
895 A, Nakagawa H, Shibata T, et al. 2016. Mutational signatures associated with tobacco  
896 smoking in human cancer. *Science* **354**: 618–622.
- 897 Alexandrov LB, Nik-Zainal S, Wedge DC, Aparicio SAJR, Behjati S, Biankin AV, Bignell GR,  
898 Bolli N, Borg A, Børresen-Dale A-L, et al. 2013. Signatures of mutational processes in  
899 human cancer. *Nature* **500**: 415–421.
- 900 Alexandrov L, Kim J, Haradhvala NJ, Huang MN, Ng AWT, Boot A, Covington KR, Gordenin  
901 DA, Bergstrom E, Lopez-Bigas N, et al. 2018. The Repertoire of Mutational Signatures  
902 in Human Cancer. <http://dx.doi.org/10.1101/322859>.
- 903 Al-Minawi AZ, Saleh-Gohari N, Helleday T. 2008. The ERCC1/XPF endonuclease is  
904 required for efficient single-strand annealing and gene conversion in mammalian cells.  
905 *Nucleic Acids Res* **36**: 1–9.
- 906 Amable L. 2016. Cisplatin resistance and opportunities for precision medicine. *Pharmacol*  
907 *Res* **106**: 27–36.
- 908 Barker N, Ridgway RA, van Es JH, van de Wetering M, Begthel H, van den Born M,  
909 Danenberg E, Clarke AR, Sansom OJ, Clevers H. 2009. Crypt stem cells as the cells-of-  
910 origin of intestinal cancer. *Nature* **457**: 608–611.
- 911 Behjati S, Huch M, van Boxtel R, Karthaus W, Wedge DC, Tamuri AU, Martincorena I,  
912 Petljak M, Alexandrov LB, Gundem G, et al. 2014. Genome sequencing of normal cells  
913 reveals developmental lineages and mutational processes. *Nature* **513**: 422–425.
- 914 Bergeron F, Auvré F, Radicella JP, Ravanat J-L. 2010. HO\* radicals induce an unexpected  
915 high proportion of tandem base lesions refractory to repair by DNA glycosylases. *Proc*  
916 *Natl Acad Sci U S A* **107**: 5528–5533.
- 917 Blokzijl F, de Ligt J, Jager M, Sasselli V, Roerink S, Sasaki N, Huch M, Boymans S, Kuijk E,  
918 Prins P, et al. 2016. Tissue-specific mutation accumulation in human adult stem cells  
919 during life. *Nature* **538**: 260–264.
- 920 Blokzijl F, Janssen R, van Boxtel R, Cuppen E. 2018. MutationalPatterns: comprehensive

- 921 genome-wide analysis of mutational processes. *Genome Med* **10**: 33.
- 922 Boeva V, Popova T, Bleakley K, Chiche P, Cappo J, Schleiermacher G, Janoueix-Lerosey I,  
923 Delattre O, Barillot E. 2012. Control-FREEC: a tool for assessing copy number and  
924 allelic content using next-generation sequencing data. *Bioinformatics* **28**: 423–425.
- 925 Bowden NA. 2014. Nucleotide excision repair: Why is it not used to predict response to  
926 platinum-based chemotherapy? *Cancer Lett* **346**: 163–171.
- 927 Cadet J, Ravanat J-L, TavernaPorro M, Menoni H, Angelov D. 2012. Oxidatively generated  
928 complex DNA damage: tandem and clustered lesions. *Cancer Lett* **327**: 5–15.
- 929 Carlson M, Maintainer BP. 2015. *TxDb.Hsapiens.UCSC.hg19.knownGene: Annotation*  
930 *package for TxDb object(s)*.
- 931 Casorelli I, Tenedini E, Tagliafico E, Blasi MF, Giuliani A, Crescenzi M, Pelosi E, Testa U,  
932 Peschle C, Mele L, et al. 2006. Identification of a molecular signature for leukemic  
933 promyelocytes and their normal counterparts: Focus on DNA repair genes. *Leukemia*  
934 **20**: 1978–1988.
- 935 Davies H, Glodzik D, Morganella S, Yates LR, Staaf J, Zou X, Ramakrishna M, Martin S,  
936 Boyault S, Sieuwerts AM, et al. 2017. HRDetect is a predictor of BRCA1 and BRCA2  
937 deficiency based on mutational signatures. *Nat Med* **23**: 517–525.
- 938 Degtyareva NP, Heyburn L, Sterling J, Resnick MA, Gordenin DA, Doetsch PW. 2013.  
939 Oxidative stress-induced mutagenesis in single-strand DNA occurs primarily at  
940 cytosines and is DNA polymerase zeta-dependent only for adenines and guanines.  
941 *Nucleic Acids Res* **41**: 8995–9005.
- 942 de Laat W. 1998. Mapping of interaction domains between human repair proteins ERCC1  
943 and XPF. *Nucleic Acids Res* **26**: 4146–4152.
- 944 Dollé MET, Busuttill RA, Garcia AM, Wijnhoven S, van Drunen E, Niedernhofer LJ, van der  
945 Horst G, Hoeijmakers JHJ, van Steeg H, Vijg J. 2006. Increased genomic instability is  
946 not a prerequisite for shortened lifespan in DNA repair deficient mice. *Mutat Res* **596**:  
947 22–35.
- 948 Dollé MT, Kuiper R, Roodbergen M, Robinson J, de Vlugt S, Wijnhoven SP, Beems RB, de  
949 la Fonteyne L, de With P, van der Pluijm I, et al. 2011. Broad segmental progeroid  
950 changes in short-lived *Ercc1*  $-/\Delta 7$  mice. *Pathobiology of Aging & Age-related Diseases*  
951 **1**: 7219.
- 952 Drost J, van Boxtel R, Blokzijl F, Mizutani T, Sasaki N, Sasselli V, de Ligt J, Behjati S,  
953 Grolleman JE, van Wezel T, et al. 2017. Use of CRISPR-modified human stem cell  
954 organoids to study the origin of mutational signatures in cancer. *Science*.  
955 <http://dx.doi.org/10.1126/science.aao3130>.
- 956 Dupuy A, Sarasin A. 2015. DNA damage and gene therapy of xeroderma pigmentosum, a  
957 human DNA repair-deficient disease. *Mutat Res* **776**: 2–8.
- 958 Durinck S, Moreau Y, Kasprzyk A, Davis S, De Moor B, Brazma A, Huber W. 2005. BioMart  
959 and Bioconductor: a powerful link between biological databases and microarray data  
960 analysis. *Bioinformatics* **21**: 3439–3440.
- 961 Durinck S, Spellman PT, Birney E, Huber W. 2009. Mapping identifiers for the integration of  
962 genomic datasets with the R/Bioconductor package biomaRt. *Nat Protoc* **4**: 1184–1191.

- 963 Gregg SQ, Gutiérrez V, Robinson AR, Woodell T, Nakao A, Ross MA, Michalopoulos GK,  
964 Rigatti L, Rothermel CE, Kamileri I, et al. 2012. A mouse model of accelerated liver  
965 aging caused by a defect in DNA repair. *Hepatology* **55**: 609–621.
- 966 Hoeijmakers JHJ. 2009. DNA damage, aging, and cancer. *N Engl J Med* **361**: 1475–1485.
- 967 Huang MN, Yu W, Teoh WW, Ardin M, Jusakul A, Ng AWT, Boot A, Abedi-Ardekani B, Villar  
968 S, Myint SS, et al. 2017. Genome-scale mutational signatures of aflatoxin in cells, mice,  
969 and human tumors. *Genome Res* **27**: 1475–1486.
- 970 Huch M, Gehart H, van Boxtel R, Hamer K, Blokzijl F, Verstegen MMA, Ellis E, van Wenum  
971 M, Fuchs SA, de Ligt J, et al. 2015. Long-term culture of genome-stable bipotent stem  
972 cells from adult human liver. *Cell* **160**: 299–312.
- 973 Iyama T, Wilson DM 3rd. 2013. DNA repair mechanisms in dividing and non-dividing cells.  
974 *DNA Repair* **12**: 620–636.
- 975 Jager M, Blokzijl F, Sasselli V, Boymans S, Besselink N, Janssen R, Clevers H, van Boxtel  
976 R, Cuppen E. 2018. Measuring mutation accumulation in single human adult stem cells  
977 by whole-genome sequencing of organoid cultures. *Nat Protoc* **13**: 59.
- 978 Kamiya H, Murata-Kamiya N, Koizume S, Inoue H, Nishimura S, Ohtsuka E. 1995. 8-  
979 Hydroxyguanine (7,8-dihydro-8-oxoguanine) in hot spots of the c-Ha-ras gene: effects of  
980 sequence contexts on mutation spectra. *Carcinogenesis* **16**: 883–889.
- 981 Kim J, Mouw KW, Polak P, Braunstein LZ, Kamburov A, Kwiatkowski DJ, Rosenberg JE,  
982 Van Allen EM, D'Andrea A, Getz G. 2016. Somatic ERCC2 mutations are associated  
983 with a distinct genomic signature in urothelial tumors. *Nat Genet* **48**: 600–606.
- 984 Kirschner K, Melton DW. 2010. Multiple roles of the ERCC1-XPF endonuclease in DNA  
985 repair and resistance to anticancer drugs. *Anticancer Res* **30**: 3223–3232.
- 986 Kuijk EW, Rasmussen S, Blokzijl F, Huch M, Gehart H, Toonen P, Begthel H, Clevers H,  
987 Geurts AM, Cuppen E. 2016. Generation and characterization of rat liver stem cell lines  
988 and their engraftment in a rat model of liver failure. *Sci Rep* **6**.  
989 <http://dx.doi.org/10.1038/srep22154>.
- 990 Lee D-H. 2002. Oxidative DNA damage induced by copper and hydrogen peroxide promotes  
991 CG->TT tandem mutations at methylated CpG dinucleotides in nucleotide excision  
992 repair-deficient cells. *Nucleic Acids Res* **30**: 3566–3573.
- 993 Li H, Durbin R. 2009. Fast and accurate short read alignment with Burrows-Wheeler  
994 transform. *Bioinformatics* **25**: 1754–1760.
- 995 Li Q, Yu JJ, Mu C, Yunmbam MK, Slavsky D, Cross CL, Bostick-Bruton F, Reed E. 2000.  
996 Association between the level of ERCC-1 expression and the repair of cisplatin-induced  
997 DNA damage in human ovarian cancer cells. *Anticancer Res* **20**: 645–652.
- 998 Lodato MA, Rodin RE, Bohrson CL, Coulter ME, Barton AR, Kwon M, Sherman MA, Vitzhum  
999 CM, Luquette LJ, Yandava C, et al. 2017. Aging and neurodegeneration are associated  
1000 with increased mutations in single human neurons. <http://dx.doi.org/10.1101/221960>.
- 1001 Marteijn JA, Lans H, Vermeulen W, Hoeijmakers JHJ. 2014. Understanding nucleotide  
1002 excision repair and its roles in cancer and ageing. *Nat Rev Mol Cell Biol* **15**: 465–481.
- 1003 Melis JPM, P.M. Melis J, W.P. Wijnhoven S, Beems RB, Roodbergen M, van den Berg J,  
1004 Moon H, Friedberg E, van der Horst GTJ, H.J. Hoeijmakers J, et al. 2008. Mouse



- 1005 Models for Xeroderma Pigmentosum Group A and Group C Show Divergent Cancer  
1006 Phenotypes. *Cancer Res* **68**: 1347–1353.
- 1007 Naipal KAT, Raams A, Bruens ST, Brandsma I, Verkaik NS, Jaspers NGJ, Hoeijmakers JHJ,  
1008 van Leenders GJLH, Pothof J, Kanaar R, et al. 2015. Attenuated XPC Expression Is Not  
1009 Associated with Impaired DNA Repair in Bladder Cancer. *PLoS One* **10**: e0126029.
- 1010 Niedernhofer LJ, Garinis GA, Raams A, Lalai AS, Robinson AR, Appeldoorn E, Odijk H,  
1011 Oostendorp R, Ahmad A, van Leeuwen W, et al. 2006. A new progeroid syndrome  
1012 reveals that genotoxic stress suppresses the somatotroph axis. *Nature* **444**: 1038–1043.
- 1013 Nik-Zainal S, Davies H, Staaf J, Ramakrishna M, Glodzik D, Zou X, Martincorena I,  
1014 Alexandrov LB, Martin S, Wedge DC, et al. 2016. Landscape of somatic mutations in  
1015 560 breast cancer whole genome sequences. *Nature* **534**: 47.
- 1016 Ni M, Zhang W-Z, Qiu J-R, Liu F, Li M, Zhang Y-J, Liu Q, Bai J. 2014. Association of ERCC1  
1017 and ERCC2 polymorphisms with colorectal cancer risk in a Chinese population. *Sci Rep*  
1018 **4**. <http://dx.doi.org/10.1038/srep04112>.
- 1019 Olausson KA, Dunant A, Fouret P, Brambilla E, André F, Haddad V, Taranchon E, Filipits M,  
1020 Pirker R, Popper HH, et al. 2006. DNA repair by ERCC1 in non-small-cell lung cancer  
1021 and cisplatin-based adjuvant chemotherapy. *N Engl J Med* **355**: 983–991.
- 1022 Pearl LH, Schierz AC, Ward SE, Al-Lazikani B, Pearl FMG. 2015. Therapeutic opportunities  
1023 within the DNA damage response. *Nat Rev Cancer* **15**: 166–180.
- 1024 Perera D, Poulos RC, Shah A, Beck D, Pimanda JE, Wong JWH. 2016. Differential DNA  
1025 repair underlies mutation hotspots at active promoters in cancer genomes. *Nature* **532**:  
1026 259–263.
- 1027 Petljak M, Alexandrov LB. 2016. Understanding mutagenesis through delineation of  
1028 mutational signatures in human cancer. *Carcinogenesis* **37**: 531–540.
- 1029 Pleasance ED, Cheetham RK, Stephens PJ, McBride DJ, Humphray SJ, Greenman CD,  
1030 Varela I, Lin M-L, Ordóñez GR, Bignell GR, et al. 2010. A comprehensive catalogue of  
1031 somatic mutations from a human cancer genome. *Nature* **463**: 191–196.
- 1032 Puumalainen M-R, Rüthemann P, Min J-H, Naegeli H. 2015. Xeroderma pigmentosum group  
1033 C sensor: unprecedented recognition strategy and tight spatiotemporal regulation. *Cell*  
1034 *Mol Life Sci* **73**: 547–566.
- 1035 Rahn JJ, Adair GM, Nairn RS. 2010. Multiple roles of ERCC1-XPF in mammalian interstrand  
1036 crosslink repair. *Environ Mol Mutagen* **51**: 567–581.
- 1037 Rausch T, Zichner T, Schlattl A, Stütz AM, Benes V, Korbel JO. 2012. DELLY: structural  
1038 variant discovery by integrated paired-end and split-read analysis. *Bioinformatics* **28**:  
1039 i333–i339.
- 1040 Sands AT, Abuin A, Sanchez A, Conti CJ, Bradley A. 1995. High susceptibility to ultraviolet-  
1041 induced carcinogenesis in mice lacking XPC. *Nature* **377**: 162–165.
- 1042 Sato T, Vries RG, Snippert HJ, van de Wetering M, Barker N, Stange DE, van Es JH, Abo A,  
1043 Kujala P, Peters PJ, et al. 2009. Single Lgr5 stem cells build crypt–villus structures in  
1044 vitro without a mesenchymal niche. *Nature* **459**: 262–265.
- 1045 Schuster-Böckler B, Lehner B. 2012. Chromatin organization is a major influence on regional  
1046 mutation rates in human cancer cells. *Nature* **488**: 504–507.

- 1047 Sijbers AM, de Laat WL, Ariza RR, Biggerstaff M, Wei Y-F, Moggs JG, Carter KC, Shell BK,  
1048 Evans E, de Jong MC, et al. 1996a. Xeroderma Pigmentosum Group F Caused by a  
1049 Defect in a Structure-Specific DNA Repair Endonuclease. *Cell* **86**: 811–822.
- 1050 Sijbers AM, van der Spek PJ, Odijk H, van den Berg J, van Duin M, Westerveld A, Jaspers  
1051 NG, Bootsma D, Hoeijmakers JH. 1996b. Mutational analysis of the human nucleotide  
1052 excision repair gene ERCC1. *Nucleic Acids Res* **24**: 3370–3380.
- 1053 Stubbert LJ, Smith JM, McKay BC. 2010. Decreased transcription-coupled nucleotide  
1054 excision repair capacity is associated with increased p53- and MLH1-independent  
1055 apoptosis in response to cisplatin. *BMC Cancer* **10**: 207.
- 1056 Su Y, Orelli B, Madireddy A, Niedernhofer LJ, Scharer OD. 2012. Multiple DNA Binding  
1057 Domains Mediate the Function of the ERCC1-XPF Protein in Nucleotide Excision  
1058 Repair. *J Biol Chem* **287**: 21846–21855.
- 1059 Team BC, Maintainer BP. 2016. *TxDb.Mmusculus.UCSC.mm10.knownGene: Annotation*  
1060 *package for TxDb object(s)*.
- 1061 Tripsianes K, Folkers G, Ab E, Das D, Odijk H, Jaspers NGJ, Hoeijmakers JHJ, Kaptein R,  
1062 Boelens R. 2005. The structure of the human ERCC1/XPF interaction domains reveals  
1063 a complementary role for the two proteins in nucleotide excision repair. *Structure* **13**:  
1064 1849–1858.
- 1065 Van Allen EM, Mouw KW, Kim P, Iyer G, Wagle N, Al-Ahmadie H, Zhu C, Ostrovnaya I,  
1066 Kryukov GV, O'Connor KW, et al. 2014. Somatic ERCC2 mutations correlate with  
1067 cisplatin sensitivity in muscle-invasive urothelial carcinoma. *Cancer Discov* **4**: 1140–  
1068 1153.
- 1069 Van der Auwera GA, Carneiro MO, Hartl C, Poplin R, Del Angel G, Levy-Moonshine A,  
1070 Jordan T, Shakir K, Roazen D, Thibault J, et al. 2013. From FastQ data to high  
1071 confidence variant calls: the Genome Analysis Toolkit best practices pipeline. *Curr*  
1072 *Protoc Bioinformatics* **43**: 11.10.1–33.
- 1073 Vermeij WP, Dollé MET, Reiling E, Jaarsma D, Payan-Gomez C, Bombardieri CR, Wu H,  
1074 Roks AJM, Botter SM, van der Eerden BC, et al. 2016. Restricted diet delays  
1075 accelerated ageing and genomic stress in DNA-repair-deficient mice. *Nature* **537**: 427–  
1076 431.
- 1077 Waddell N, Pajic M, Patch A-M, Chang DK, Kassahn KS, Bailey P, Johns AL, Miller D,  
1078 Nones K, Quek K, et al. 2015. Whole genomes redefine the mutational landscape of  
1079 pancreatic cancer. *Nature* **518**: 495–501.
- 1080 Weeda G, Donker I, de Wit J, Morreau H, Janssens R, Vissers CJ, Nigg A, van Steeg H,  
1081 Bootsma D, Hoeijmakers JHJ. 1997. Disruption of mouse ERCC1 results in a novel  
1082 repair syndrome with growth failure, nuclear abnormalities and senescence. *Curr Biol* **7**:  
1083 427–439.
- 1084 Zhang R, Jia M, Xue H, Xu Y, Wang M, Zhu M, Sun M, Chang J, Wei Q. 2017. Genetic  
1085 variants in ERCC1 and XPC predict survival outcome of non-small cell lung cancer  
1086 patients treated with platinum-based therapy. *Sci Rep* **7**: 10702.
- 1087 Zheng CL, Wang NJ, Chung J, Moslehi H, Sanborn JZ, Hur JS, Collisson EA, Vemula SS,  
1088 Naujokas A, Chiotti KE, et al. 2014. Transcription restores DNA repair to  
1089 heterochromatin, determining regional mutation rates in cancer genomes. *Cell Rep* **9**:  
1090 1228–1234.



- 1091 Zhu L, Finkelstein D, Gao C, Shi L, Wang Y, López-Terrada D, Wang K, Utley S, Pounds S,  
1092 Neale G, et al. 2016. Multi-organ Mapping of Cancer Risk. *Cell* **166**: 1132–1146.e7.
- 1093 Zou X, Owusu M, Harris R, Jackson SP, Loizou JI, Nik-Zainal S. 2018. Validating the  
1094 concept of mutational signatures with isogenic cell models. *Nat Commun* **9**: 1744.
- 1095
